# Supplementary material for: Nonsense mutation in PMEL is associated with yellowish plumage colour phenotype in Japanese quail
Source: PubMed Central journal article supplement (PMC6233202; doi:10.1038/s41598-018-34827-4), 2018-11-13
Supplement: 41598_2018_34827_MOESM1_ESM.pdf [file 41598_2018_34827_MOESM1_ESM.pdf]

## **Supplementary Information**

### **Nonsense mutation in PMEL is associated with yellowish**

### **plumage colour phenotype in Japanese quail**

**Satoshi Ishishita<sup>1†</sup>, Mayuko Takahashi<sup>2†</sup>, Katsushi Yamaguchi<sup>3</sup>, Keiji Kinoshita<sup>1</sup>,  
Mikiharu Nakano<sup>1</sup>, Mitsuo Nunome<sup>1</sup>, Shumpei Kitahara<sup>2</sup>, Shoji Tatsumoto<sup>4</sup>,  
Yasuhiro Go<sup>4,5</sup>, Shuji Shigenobu<sup>3</sup>, Yoichi Matsuda<sup>1,2\*</sup>**

<sup>1</sup>Avian Bioscience Research Center, Graduate School of Bioagricultural Sciences, Nagoya University, Furo-cho, Chikusa-ku, Nagoya, Aichi, 464-8601, Japan

<sup>2</sup>Laboratory of Animal Genetics, Department of Applied Molecular Biosciences, Graduate School of Bioagricultural Sciences, Nagoya University, Furo-cho, Chikusa-ku, Nagoya, Aichi, 464-8601, Japan

<sup>3</sup>Functional Genomics Facility, National Institute for Basic Biology, Okazaki, Aichi 444-8585, Japan

<sup>4</sup>Exploratory Research Center on Life and Living Systems (ExCELLS), National Institutes of Natural Sciences, Okazaki, Aichi 444-8585, Japan

<sup>5</sup>National Institute for Physiological Sciences, Okazaki, Aichi 444-8585, Japan

† These authors contributed equally to this work

\* Corresponding author.

## Supplementary note

### Analysis of paired-end reads by Stacks

The sequence data were demultiplexed by barcode, cleaned by removing reads of low quality, and shortened to 95 bp (1st run) or 100 bp (2nd and 3rd runs) using the Stacks program 'process\_radtags' (-c -q -r --adapter\_mm 1 -t 100). The processed reads were aligned to the *Coturnix japonica* 2.0 (GCF\_001577835.1) draft genome using the program Bowtie 2 ver. 2.2.8 (Langmead *et al.*, 2009) with default parameters. Only paired reads aligned concordantly to the reference genome at one time were analysed by the Stacks program 'ref\_map.pl'.

The 'ref\_map.pl' executes several programs: (i) 'pstack', which builds loci according to the alignment position of each read; (ii) 'cstacks', which creates catalogues of all loci for the parents and F<sub>2</sub> offspring; and (iii) 'sstcks', which matches each catalogue of loci of F<sub>2</sub> offspring against catalogues of the parents. The parameters of ref\_map.pl were set as the default except for the number of mismatches allowed between sample loci when build the catalog (-n = 3). The minimum depth of coverage to report a stack in pstacks was three (-m = 3). The Stacks program 'genotypes' was executed to export the genotype dataset for the F<sub>2</sub> offspring. The parameters of 'genotype' were set as the default: minimum number of progeny required to print a marker (-r = 1). This outputted a genotype dataset of parents and 196 F<sub>2</sub> offspring, which contained genotypes at a total of 100,613 markers, although genotype data were missing at many sites in the data set.

### Procedure for selection of Z-chromosome-linked markers

To select Z chromosome-linked markers, the genotype data were divided by gender after premapping quality control procedures (i) and (ii). In F<sub>1</sub> progeny, the two Z chromosomes in males are derived from both parental strains, and either of these chromosomes is transmitted to F<sub>2</sub> males and females; however, a single Z chromosome in females is derived from the paternal WE strain male and is only transmitted to F<sub>2</sub> males, except for the pseudoautosomal region (PAR) (markers

on the PAR were not identified in this study). Therefore, we searched markers showing heterozygosity or homozygosity for the WE strain-type allele in >90% of F<sub>2</sub> males, and those showing either the L or WE strain-type allele in >90% F<sub>2</sub> females.

### **Generation of a genotype dataset for a case-control association test**

SNP markers and individuals used for a case-control association test were selected in the following manner. To eliminate markers located on highly repetitive DNA sequences, those showing more than 1,500 of coverage depth per individual were eliminated. Loci with a minimum coverage (eight in this study) in each individual, which consisted of one or two alleles with a given minimum coverage (three in this study) in each allele, were used for genotyping. This filtering was performed using a custom R script, based on marker depth output by ‘sstacks’ of the Stacks program. Markers that were not assigned to known chromosomes or linkage groups were eliminated from the genotype data set. The dataset containing genotypes at 10,498 markers were yielded by the filtering.

The genotype data set underwent premapping quality control (van Ooijen and Jansen, 2013), which excluded (i) individuals with a lot of missing data (>70% in this study); (ii) markers with a lot of missing data (>5% in this study); and (iii) markers with highly significant segregation distortion (SD) ( $P < 0.001$  with Bonferroni correction in this study). After excluding markers with highly significant SD, we selected candidate Z-linked markers that were shared between males and females. After these filtering steps, the coverage depth of each genotype in the F<sub>2</sub> offspring was more than 7 and less than 250.

The genotype data set were analysed by the software Lep-MAP2 (LM2), which can construct genetic maps from a large data set (Rastas *et al.*, 2015). Three modules of LM2, SeparateChromosomes, Joinsingles, and OrderMarkers, were used to construct a genetic map. The SeparateChromosomes module assigns markers into LGs by calculating all pair-wise LOD scores

between markers and subsequently joins markers with LOD scores higher than a given parameter 'lodLimit' (LodLimit=20 in this study). The JoinSingles module assigns singular markers into existing LGs by calculating LOD scores between each singular marker and markers in the existing LGs and joins markers with LOD scores higher than a given parameter (LodLimit=10 in this study). The OrderMarkers module orders markers within each LG as the likelihood of the data becomes maximized. We arranged autosomal markers into 33 LGs using the SeparateChromosomes module. The minimum size of LGs was set as 2 (sizeLimit=2). Two autosomal markers were not assigned into any LGs by the SeparateChromosome module, and these markers were also not assigned into any LGs by the JoinSingles module. Markers within the 33 LGs were ordered using the OrderMarkers module. This module was used with options to set the number of iteration of calculation (numMergeIterations=10) and to calculate sex averaged genetic distances between adjacent markers with the Kosambi mapping function (sexAveraged=1, useKosambi=1). Z-linked markers were analysed by LM2 independently of autosomal markers by the same procedure as that for autosomal markers except for two options in the OrderMarkers module (initRecombination=0.05 0.000000001 learnRecombinationParameters=1 0), which were required for computation of the marker order and distances between markers without recombination in female meiosis. A genetic map consisting of a total of 34 linkage groups was constructed at this step.

Markers with similar or identical genotypes, which were located on an identical position on the genetic map, were eliminated from the genotype dataset. Markers mapped to chromosome 1 were grouped into two different LGs. A similar separation of linkage groups on the same chromosome occurred for markers mapped to chromosome 2 and LGE22. These separated marker groups were joined manually into single groups. To correct the genetic map, we searched for markers showing >5-cM genetic distance between adjacent markers, and then apparently erroneous marker ordering was corrected by rearranging markers or excluding markers with a high frequency of double recombination. After eliminating markers with highly significant SD,

the final genetic map was constructed. Distances between markers in the final genotype dataset were recalculated by Map Manager QTX ver. 0.30 (Manly *et al.*, 2001) with the Kosambi mapping function. The genetic map was visualised by a custom R script.

## References

Langmead, B., Trapnell, C., Pop, M. & Salzberg, S. L. Ultrafast and memory-efficient alignment of short DNA sequences to the human genome. *Genome Biol.* **10**, R25 (2009).

van Ooijen JW & Jansen J (2013) *Genetic mapping in experimental populations*. (Cambridge University Press, Cambridge, U.K., 2013).

Rastas, P., Calboli, F. C. F., Guo, B., Shikano, T. & Merilä, J. Construction of ultradense linkage maps with Lep-MAP2: stickleback F2 recombinant crosses as an example. *Genome Biol. Evol.* **8**, 78–93 (2015).

Manly, K. F., Cudmore, R. H. & Meer, J. M. Map Manager QTX, cross-platform software for genetic mapping. *Mamm. Genome.* **12**, 930–932 (2001).

Table S1. Summary of genetic map.

| Chr.    | Size of chr. <sup>a</sup> (Mb) | No. of markers | Length (cM) | Average of intermarker distance (cM) | Max. of intermarker distance (cM) | Proximal <sup>b</sup> (Mb) | Distal <sup>c</sup> (Mb) | Proximal–Distal <sup>d</sup> (Mb) | Covered region <sup>e</sup> (%) | cM/Mb <sup>f</sup> | Average of intermarker distance (Mb) |
|---------|--------------------------------|----------------|-------------|--------------------------------------|-----------------------------------|----------------------------|--------------------------|-----------------------------------|---------------------------------|--------------------|--------------------------------------|
| 1       | 175.66                         | 331            | 316.9       | 1                                    | 30.8                              | 0.25                       | 174.76                   | 174.51                            | 99.3                            | 1.8                | 0.5                                  |
| 2       | 134.82                         | 266            | 253         | 1                                    | 31.6                              | 0.87                       | 134.64                   | 133.76                            | 99.2                            | 1.9                | 0.5                                  |
| 3       | 100.94                         | 220            | 181         | 0.8                                  | 5.8                               | 0.13                       | 100.22                   | 100.09                            | 99.2                            | 1.8                | 0.5                                  |
| 4       | 82.19                          | 138            | 131.9       | 1                                    | 6.5                               | 1.59                       | 81.98                    | 80.39                             | 97.8                            | 1.6                | 0.6                                  |
| 5       | 54.02                          | 124            | 114.8       | 0.9                                  | 4.9                               | 1.22                       | 53.93                    | 52.71                             | 97.6                            | 2.2                | 0.4                                  |
| 6       | 31.42                          | 49             | 62.9        | 1.3                                  | 7                                 | 2.04                       | 30.66                    | 28.62                             | 91.1                            | 2.2                | 0.6                                  |
| 7       | 33.42                          | 60             | 79.4        | 1.3                                  | 5.7                               | 0.18                       | 33.27                    | 33.09                             | 99                              | 2.4                | 0.6                                  |
| 8       | 26.89                          | 87             | 61          | 0.7                                  | 2.9                               | 0.11                       | 25.57                    | 25.46                             | 94.7                            | 2.4                | 0.3                                  |
| 9       | 21.33                          | 78             | 63.2        | 0.8                                  | 3.5                               | 0.7                        | 19.83                    | 19.13                             | 89.7                            | 3.3                | 0.2                                  |
| 10      | 18.48                          | 66             | 60.1        | 0.9                                  | 5.3                               | 0.63                       | 17.54                    | 16.91                             | 91.5                            | 3.6                | 0.3                                  |
| 11      | 17.8                           | 57             | 51.7        | 0.9                                  | 5.3                               | 3.32                       | 17.68                    | 14.36                             | 80.7                            | 3.6                | 0.3                                  |
| 12      | 17.22                          | 56             | 62.3        | 1.1                                  | 4.8                               | 0.13                       | 16.89                    | 16.76                             | 97.3                            | 3.7                | 0.3                                  |
| 13      | 15.71                          | 52             | 56.7        | 1.1                                  | 4.6                               | 0.58                       | 15.39                    | 14.81                             | 94.3                            | 3.8                | 0.3                                  |
| 14      | 12.83                          | 51             | 60.6        | 1.2                                  | 6.2                               | 1.55                       | 12.53                    | 10.98                             | 85.6                            | 5.5                | 0.2                                  |
| 15      | 11.7                           | 41             | 48.6        | 1.2                                  | 4.1                               | 1.53                       | 10.6                     | 9.07                              | 77.5                            | 5.4                | 0.2                                  |
| 16      | 0.35                           | 2              | 0.3         | 0.3                                  | 0.3                               | 0.25                       | 0.28                     | 0.03                              | 8.6                             | 10                 | -                                    |
| 17      | 8.97                           | 21             | 53          | 2.6                                  | 14.1                              | 0.35                       | 8.33                     | 7.98                              | 89                              | 6.6                | 0.4                                  |
| 18      | 9.55                           | 38             | 55.7        | 1.5                                  | 12.4                              | 0.1                        | 8.44                     | 8.34                              | 87.3                            | 6.7                | 0.2                                  |
| 19      | 8.76                           | 16             | 36.2        | 2.4                                  | 8.7                               | 0.99                       | 5.04                     | 4.05                              | 46.2                            | 8.9                | 0.3                                  |
| 20      | 12.45                          | 42             | 53.1        | 1.3                                  | 6                                 | 0.45                       | 12.35                    | 11.9                              | 95.6                            | 4.5                | 0.3                                  |
| 21      | 5.95                           | 25             | 69.5        | 2.9                                  | 12                                | 0.17                       | 5.56                     | 5.39                              | 90.6                            | 12.9               | 0.2                                  |
| 22      | 4.13                           | 15             | 59          | 4.2                                  | 11.4                              | 0.19                       | 3.96                     | 3.76                              | 91                              | 15.7               | 0.3                                  |
| 23      | 5.05                           | 17             | 48.5        | 3                                    | 13.4                              | 0.71                       | 4.03                     | 3.32                              | 65.7                            | 14.6               | 0.2                                  |
| 24      | 5.5                            | 22             | 52.2        | 2.5                                  | 7.4                               | 0.35                       | 5.47                     | 5.12                              | 93.1                            | 10.2               | 0.2                                  |
| 25      | 2.51                           | 13             | 26          | 2.2                                  | 7.6                               | 0.81                       | 1.89                     | 1.08                              | 43                              | 24.1               | 0.1                                  |
| 26      | 4.93                           | 20             | 54.8        | 2.9                                  | 21.3                              | 0.79                       | 4.49                     | 3.7                               | 75.1                            | 14.8               | 0.2                                  |
| 27      | 4.78                           | 13             | 43          | 3.6                                  | 13                                | 1.66                       | 4.1                      | 2.43                              | 50.8                            | 17.7               | 0.2                                  |
| 28      | 4.02                           | 22             | 55.1        | 2.6                                  | 13.9                              | 0.33                       | 3.95                     | 3.62                              | 90                              | 15.2               | 0.2                                  |
| LGE22   | 1.78                           | 5              | 55.1        | 13.8                                 | 44.6                              | 0.26                       | 1.31                     | 1.04                              | 58.4                            | 53                 | 0.2                                  |
| LGE64   | 0.58                           | 2              | 0.3         | 0.3                                  | 0.3                               | 0.34                       | 0.37                     | 0.03                              | 5.2                             | 10                 | -                                    |
| Z       | 67                             | 55             | 87.7        | 1.6                                  | 6.4                               | 0.3                        | 66.44                    | 66.14                             | 98.7                            | 1.3                | 1.2                                  |
| Overall | 900.74                         | 2004           | 2353.6      | 1.2                                  | 44.6                              | -                          | -                        | 858.58                            | 95.3                            | 2.7                | 0.4                                  |

<sup>a</sup> The size of each chromosome or LG in *Coturnix japonica* 2.0.

<sup>b</sup> The nearest marker proximal to the start site.

<sup>c</sup> The farthest marker distal to the start site.

<sup>d</sup> The distance between the most proximal and distal markers.

<sup>e</sup> Percentage of distance between the most proximal and distal makers in the total length of each chromosome or LG.

<sup>f</sup> Recombination rate.

Table S2. Recombination fractions and LOD scores between the *yw* locus and all markers in LGE22.

| SNPs     | Recombination fractions | LOD scores |
|----------|-------------------------|------------|
| 295443   | 0.122                   | 11.48      |
| 295438   | 0.119                   | 11.97      |
| 295380   | 0.093                   | 14.33      |
| g.811370 | 0.000                   | 26.49      |
| 295244   | 0.159                   | 9.75       |
| 295306   | 0.227                   | 6.01       |

Recombination fractions and LOD scores were estimated using genotype data of homozygous mutant individuals of F<sub>2</sub> hybrids.

Table S3. Genes within the causative genomic region.

| Gene ID   | Symbol       | Description                                                                                       | Start_position | End_position | Orientation |
|-----------|--------------|---------------------------------------------------------------------------------------------------|----------------|--------------|-------------|
| 107325708 | DIP2B        | disco interacting protein 2 homolog B                                                             | 206942         | 266333       | minus       |
| 107325712 | LARP4        | La ribonucleoprotein domain family member 4                                                       | 266937         | 284550       | minus       |
| 107325701 | LIMA1        | LIM domain and actin binding 1                                                                    | 292071         | 315762       | plus        |
| 107325707 | LOC107325707 | uncharacterized LOC107325707                                                                      | 292278         | 317246       | minus       |
| 107325704 | CERS5        | ceramide synthase 5                                                                               | 317280         | 335184       | plus        |
| 107325706 | LOC107325706 | cytochrome c oxidase assembly protein COX14                                                       | 336421         | 338089       | minus       |
| 107325705 | GPD1         | glycerol-3-phosphate dehydrogenase 1                                                              | 338201         | 342954       | minus       |
| 107325703 | SMARCD1      | SWI/SNF related, matrix associated, actin dependent regulator of chromatin, subfamily d, member 1 | 343642         | 350812       | minus       |
| 107325723 | ASIC1        | acid sensing ion channel subunit 1                                                                | 355661         | 371556       | minus       |
| 107325722 | RACGAP1      | Rac GTPase activating protein 1                                                                   | 384141         | 391976       | plus        |
| 107325714 | HDAC7        | histone deacetylase 7                                                                             | 403795         | 460106       | plus        |
| 107325715 | LOC107325715 | twist-related protein 2-like                                                                      | 460865         | 463774       | minus       |
| 107325720 | SLC48A1      | solute carrier family 48 member 1                                                                 | 474347         | 484037       | minus       |
| 107325717 | RAPGEF3      | Rap guanine nucleotide exchange factor 3                                                          | 494853         | 509573       | plus        |
| 107325719 | ENDOUB       | endonuclease, poly(U) specific                                                                    | 511293         | 517955       | plus        |
| 107325700 | NEUROD4      | neuronal differentiation 4                                                                        | 527600         | 532542       | minus       |
| 107325698 | LOC107325698 | protein SUPPRESSOR OF GENE SILENCING 3 homolog                                                    | 548879         | 550115       | minus       |
| 107325693 | TESPA1       | thymocyte expressed, positive selection associated 1                                              | 550109         | 561401       | minus       |
| 107325732 | PPP1R1A      | protein phosphatase 1 regulatory inhibitor subunit 1A                                             | 571249         | 579751       | plus        |
| 107325730 | PDE1B        | phosphodiesterase 1B                                                                              | 582550         | 593872       | minus       |
| 107325731 | NCKAP1L      | NCK associated protein 1 like                                                                     | 607006         | 620937       | minus       |
| 107325729 | GTSF1        | gametocyte specific factor 1                                                                      | 621819         | 630935       | plus        |
| 107325740 | ARF3         | ADP ribosylation factor 3                                                                         | 682361         | 683701       | minus       |
| 107325739 | WNT1         | Wnt family member 1                                                                               | 688047         | 696008       | plus        |
| 107325757 | PRKAG1       | protein kinase AMP-activated non-catalytic subunit gamma 1                                        | 707820         | 714298       | minus       |
| 107325738 | KMT2D        | lysine methyltransferase 2D                                                                       | 718999         | 749252       | minus       |
| 107325761 | DHH          | desert hedgehog                                                                                   | 751775         | 756381       | minus       |
| 107325760 | LMBR1L       | limb development membrane protein 1 like                                                          | 757266         | 762451       | minus       |
| 107325742 | LOC107325742 | tubulin alpha-1A chain                                                                            | 764872         | 785403       | minus       |
| 107325741 | LOC107325741 | tubulin alpha-1B chain-like                                                                       | 764872         | 777003       | minus       |
| 107325734 | LOC107325734 | tubulin alpha-8 chain pseudogene                                                                  | 770887         | 772927       | minus       |
| 107325743 | LOC107325743 | tubulin alpha-1C chain                                                                            | 789186         | 793596       | plus        |
| 107325758 | LOC107325758 | transmembrane protein 198-like                                                                    | 794116         | 797862       | plus        |
| 107325759 | PYM1         | PYM homolog 1, exon junction complex associated factor                                            | 797693         | 800937       | minus       |
| 107325737 | DGKA         | diacylglycerol kinase alpha                                                                       | 801183         | 807808       | plus        |
| 107325756 | PMEL         | premelanosome protein                                                                             | 807870         | 812723       | minus       |
| 107325763 | CDK2         | cyclin dependent kinase 2                                                                         | 814942         | 817700       | plus        |
| 107325751 | RAB5B        | RAB5B, member RAS oncogene family                                                                 | 818929         | 825469       | plus        |
| 107325750 | SUOX         | sulfite oxidase                                                                                   | 825526         | 827907       | plus        |
| 107325762 | IKZF4        | IKAROS family zinc finger 4                                                                       | 829130         | 839186       | plus        |
| 107325764 | RPS26        | ribosomal protein S26                                                                             | 841577         | 843447       | plus        |
| 107325755 | ERBB3        | erb-b2 receptor tyrosine kinase 3                                                                 | 846972         | 858448       | plus        |
| 107325747 | PA2G4        | proliferation-associated 2G4                                                                      | 859367         | 868729       | plus        |
| 107325749 | LOC107325749 | uncharacterized LOC107325749                                                                      | 859963         | 868872       | minus       |
| 107325748 | ZC3H10       | zinc finger CCCH-type containing 10                                                               | 871419         | 873594       | plus        |
| 107325736 | ESYT1        | extended synaptotagmin 1                                                                          | 876755         | 879154       | plus        |
| 107325752 | SMARCC2      | SWI/SNF related, matrix associated, actin dependent regulator of chromatin subfamily c member 2   | 889385         | 898653       | minus       |
| 107325754 | RNF41        | ring finger protein 41                                                                            | 899656         | 907901       | minus       |
| 107325735 | NABP2        | nucleic acid binding protein 2                                                                    | 907985         | 909946       | plus        |
| 107325733 | SLC39A5      | solute carrier family 39 member 5                                                                 | 911556         | 918885       | plus        |
| 107325745 | ANKRD52      | ankyrin repeat domain 52                                                                          | 922711         | 941702       | minus       |
| 107325746 | LOC107325746 | coenzyme Q-binding protein COQ10 homolog A, mitochondrial-like                                    | 942403         | 944238       | plus        |
| 107325809 | R3HDM2       | R3H domain containing 2                                                                           | 944609         | 965864       | minus       |
| 107325784 | LOC107325784 | inhibin beta C chain-like                                                                         | 971817         | 973972       | plus        |
| 107325767 | LOC107325767 | inhibin beta E chain-like                                                                         | 980353         | 983544       | plus        |
| 107325822 | GLI1         | GLI family zinc finger 1                                                                          | 985756         | 998034       | plus        |
| 107325810 | DNAJC14      | DnaJ heat shock protein family (Hsp40) member C14                                                 | 998591         | 1001299      | plus        |
| 107325811 | ORMDL2       | ORMDL sphingolipid biosynthesis regulator 2                                                       | 1001476        | 1003752      | minus       |
| 107325801 | SARNP        | SAP domain containing ribonucleoprotein                                                           | 1003892        | 1024329      | plus        |
| 107325827 | GDF11        | growth differentiation factor 11                                                                  | 1030586        | 1036964      | minus       |
| 107325828 | INPP1        | inositol polyphosphate-1-phosphatase                                                              | 1037987        | 1039935      | plus        |
| 107325768 | CD63         | CD63 molecule                                                                                     | 1039806        | 1041161      | plus        |
| 107325819 | RDH5         | retinol dehydrogenase 5                                                                           | 1041381        | 1044165      | minus       |
| 107325769 | BLOC1S1      | biogenesis of lysosomal organelles complex 1 subunit 1                                            | 1044226        | 1045385      | minus       |
| 107325796 | ITGA7        | integrin subunit alpha 7                                                                          | 1047040        | 1059350      | plus        |
| 107325799 | MCRS1        | microspherule protein 1                                                                           | 1059366        | 1063159      | plus        |
| 107325798 | SPATS2       | spermatogenesis associated serine rich 2                                                          | 1063291        | 1082406      | minus       |



Table S4. Plumage colour phenotypes and genotypes at the site of the candidate mutation in F<sub>2</sub> offspring.

| Individual ID | Phenotype | Genotype | Individual ID | Phenotype | Genotype | Individual ID | Phenotype | Genotype |
|---------------|-----------|----------|---------------|-----------|----------|---------------|-----------|----------|
| 419           | Yellowish | L        | 3812          | Wild type | H        | 3001          | Wild type | W        |
| 421           | Yellowish | L        | 3813          | Yellowish | L        | 3002          | Wild type | W        |
| 423           | Wild type | W        | 3816          | Wild type | W        | 3006          | Wild type | H        |
| 425           | Wild type | H        | 3817          | Wild type | W        | 3007          | Wild type | H        |
| 427           | Wild type | H        | 3822          | Wild type | H        | 3008          | Wild type | W        |
| 430           | Wild type | W        | 3824          | Wild type | H        | 3013          | Wild type | W        |
| 2982          | Wild type | H        | 4010          | Wild type | H        | 3195          | Wild type | H        |
| 2984          | Wild type | W        | 4011          | Wild type | H        | 3196          | Wild type | H        |
| 2986          | Yellowish | L        | 4014          | Wild type | W        | 3198          | Yellowish | L        |
| 2988          | Wild type | H        | 4015          | Wild type | W        | 3200          | Yellowish | L        |
| 2989          | Wild type | W        | 4017          | Wild type | H        | 3201          | Yellowish | L        |
| 2990          | Yellowish | L        | 4019          | Yellowish | L        | 3209          | Yellowish | L        |
| 2991          | Wild type | H        | 4023          | Yellowish | L        | 3211          | Wild type | H        |
| 2996          | Yellowish | L        | 4024          | Wild type | H        | 3385          | Wild type | W        |
| 3003          | Wild type | H        | 4025          | Wild type | H        | 3389          | Yellowish | L        |
| 3004          | Wild type | W        | 4031          | Wild type | H        | 3392          | Yellowish | L        |
| 3005          | Wild type | W        | 4032          | Wild type | W        | 3394          | Wild type | W        |
| 3009          | Wild type | W        | 4033          | Wild type | W        | 3395          | Wild type | H        |
| 3010          | Yellowish | L        | 4037          | Wild type | H        | 3396          | Wild type | W        |
| 3012          | Yellowish | L        | 4038          | Wild type | W        | 3397          | Wild type | H        |
| 3193          | Wild type | W        | 4168          | Yellowish | L        | 3398          | Wild type | H        |
| 3194          | Wild type | H        | 4169          | Wild type | H        | 3400          | Wild type | H        |
| 3197          | Wild type | W        | 4170          | Wild type | H        | 3402          | Wild type | H        |
| 3199          | Wild type | H        | 4171          | Wild type | W        | 3403          | Wild type | H        |
| 3203          | Yellowish | L        | 4173          | Yellowish | L        | 3404          | Yellowish | L        |
| 3204          | Wild type | H        | 4174          | Wild type | H        | 3407          | Yellowish | L        |
| 3206          | Yellowish | L        | 4175          | Wild type | H        | 3408          | Wild type | H        |
| 3207          | Yellowish | L        | 4176          | Wild type | H        | 3409          | Yellowish | L        |
| 3210          | Wild type | H        | 4179          | Yellowish | L        | 3411          | Wild type | H        |
| 3213          | Yellowish | L        | 4180          | Yellowish | L        | 3412          | Wild type | H        |
| 3214          | Wild type | H        | 4181          | Wild type | W        | 3414          | Wild type | H        |
| 3215          | Yellowish | L        | 4182          | Wild type | H        | 3415          | Wild type | H        |
| 3216          | Wild type | W        | 4185          | Wild type | H        | 3530          | Wild type | H        |
| 3217          | Wild type | H        | 9999          | Yellowish | L        | 3532          | Wild type | W        |
| 3219          | Wild type | H        | 499           | Wild type | H        | 3535          | Wild type | H        |
| 3221          | Wild type | W        | 500           | Yellowish | L        | 3538          | Yellowish | L        |
| 3388          | Wild type | H        | 530           | Wild type | H        | 3542          | Wild type | H        |
| 3390          | Wild type | H        | 537           | Wild type | H        | 3551          | Wild type | W        |
| 3393          | Yellowish | L        | 539           | Yellowish | L        | 3800          | Wild type | H        |
| 3401          | Wild type | W        | 545           | Wild type | H        | 3804          | Yellowish | L        |
| 3405          | Wild type | W        | 2733          | Wild type | H        | 3805          | Yellowish | L        |
| 3406          | Wild type | H        | 2734          | Wild type | H        | 3808          | Wild type | H        |
| 3413          | Wild type | H        | 2744          | Wild type | H        | 3811          | Wild type | H        |
| 3531          | Wild type | H        | 2748          | Wild type | H        | 3814          | Yellowish | L        |
| 3533          | Yellowish | L        | 2750          | Wild type | H        | 3815          | Wild type | W        |
| 3534          | Wild type | W        | 2753          | Wild type | H        | 3818          | Wild type | H        |
| 3536          | Wild type | H        | 2754          | Wild type | W        | 3820          | Wild type | H        |
| 3539          | Wild type | H        | 2755          | Wild type | H        | 3821          | Wild type | H        |
| 3540          | Wild type | H        | 2756          | Yellowish | L        | 3823          | Wild type | H        |
| 3541          | Wild type | H        | 2757          | Wild type | H        | 4012          | Wild type | H        |
| 3543          | Wild type | H        | 2758          | Wild type | H        | 4013          | Wild type | H        |
| 3544          | Yellowish | L        | 2759          | Wild type | H        | 4018          | Wild type | W        |
| 3545          | Yellowish | L        | 2761          | Wild type | W        | 4022          | Wild type | W        |
| 3546          | Wild type | W        | 2762          | Wild type | W        | 4027          | Wild type | H        |
| 3547          | Wild type | W        | 2763          | Wild type | H        | 4028          | Yellowish | L        |
| 3548          | Wild type | W        | 2764          | Yellowish | L        | 4030          | Wild type | W        |
| 3549          | Wild type | W        | 2981          | Wild type | W        | 4034          | Wild type | W        |
| 3550          | Wild type | H        | 2987          | Wild type | W        | 4036          | Yellowish | L        |
| 3552          | Wild type | H        | 2992          | Wild type | H        | 4039          | Wild type | W        |
| 3554          | Yellowish | L        | 2993          | Yellowish | L        | 4040          | Wild type | W        |
| 3798          | Wild type | H        | 2994          | Wild type | H        | 4041          | Wild type | H        |
| 3799          | Wild type | H        | 2995          | Yellowish | L        | 4172          | Wild type | H        |
| 3801          | Yellowish | L        | 2997          | Wild type | H        | 4177          | Wild type | H        |
| 3802          | Wild type | W        | 2998          | Wild type | W        | 4183          | Wild type | H        |
| 3806          | Wild type | H        | 2999          | Wild type | H        |               |           |          |
| 3810          | Wild type | H        | 3000          | Wild type | W        |               |           |          |

L, L/L; W, +/-; H, Heterozygotes.

Table S5. Summary of samples.

| Individual ID | Sequence sample ID | Generation     | Gender | Plumage colour | Run number | Individual ID | Sequence sample ID | Generation     | Gender | Plumage colour | Run number | Individual ID | Sequence sample ID | Generation     | Gender | Plumage colour | Run number |
|---------------|--------------------|----------------|--------|----------------|------------|---------------|--------------------|----------------|--------|----------------|------------|---------------|--------------------|----------------|--------|----------------|------------|
| 8358          | idx1_Y01_8358P     | P              | Female | Yellowish      | 1          | 8358          | idx01_Y01_P8358    | P              | Female | Yellowish      | 2          | 499           | idx01_Y01_01       | F <sub>2</sub> | Female | Wild type      | 3          |
| 7388          | idx2_Y02_7388P     | P              | Male   | Wild type      | 1          | 7388          | idx01_Y02_P7388    | P              | Male   | Wild type      | 2          | 500           | idx01_Y02_02       | F <sub>2</sub> | Female | Yellowish      | 3          |
| 419           | idx3_Y03_419M      | F <sub>2</sub> | Male   | Yellowish      | 1          | 2982          | idx01_Y03_3M       | F <sub>2</sub> | Male   | Wild type      | 2          | 530           | idx01_Y03_03       | F <sub>2</sub> | Female | Wild type      | 3          |
| 421           | idx4_Y04_421M      | F <sub>2</sub> | Male   | Yellowish      | 1          | 2984          | idx01_Y04_4M       | F <sub>2</sub> | Male   | Wild type      | 2          | 537           | idx01_Y04_04       | F <sub>2</sub> | Female | Wild type      | 3          |
| 423           | idx5_Y05_423M      | F <sub>2</sub> | Male   | Wild type      | 1          | 2986          | idx01_Y05_5M       | F <sub>2</sub> | Male   | Yellowish      | 2          | 539           | idx01_Y05_05       | F <sub>2</sub> | Female | Yellowish      | 3          |
| 425           | idx6_Y06_425F      | F <sub>2</sub> | Female | Wild type      | 1          | 2988          | idx01_Y06_6M       | F <sub>2</sub> | Male   | Wild type      | 2          | 545           | idx01_Y06_06       | F <sub>2</sub> | Female | Wild type      | 3          |
| 427           | idx7_Y07_427F      | F <sub>2</sub> | Female | Wild type      | 1          | 2989          | idx01_Y07_7M       | F <sub>2</sub> | Male   | Wild type      | 2          | 2733          | idx01_Y07_07       | F <sub>2</sub> | Female | Wild type      | 3          |
| 430           | idx8_Y08_430F      | F <sub>2</sub> | Female | Wild type      | 1          | 2990*         | idx01_Y08_8M       | F <sub>2</sub> | Male   | Yellowish      | 2          | 2734          | idx01_Y08_08       | F <sub>2</sub> | Female | Wild type      | 3          |
|               |                    |                |        |                |            | 2991          | idx01_Y09_9M       | F <sub>2</sub> | Male   | Wild type      | 2          | 2744          | idx01_Y09_09       | F <sub>2</sub> | Female | Wild type      | 3          |
|               |                    |                |        |                |            | 2996          | idx01_Y10_10M      | F <sub>2</sub> | Male   | Yellowish      | 2          | 2748          | idx01_Y10_10       | F <sub>2</sub> | Female | Wild type      | 3          |
|               |                    |                |        |                |            | 3003*         | idx01_Y13_11M      | F <sub>2</sub> | Male   | Wild type      | 2          | 2750*         | idx01_Y13_11       | F <sub>2</sub> | Female | Wild type      | 3          |
|               |                    |                |        |                |            | 3004          | idx01_Y17_12M      | F <sub>2</sub> | Male   | Wild type      | 2          | 2753          | idx01_Y17_12       | F <sub>2</sub> | Female | Wild type      | 3          |
|               |                    |                |        |                |            | 3005          | idx01_Y18_13M      | F <sub>2</sub> | Male   | Wild type      | 2          | 2754          | idx01_Y18_13       | F <sub>2</sub> | Female | Wild type      | 3          |
|               |                    |                |        |                |            | 3009          | idx01_Y19_14M      | F <sub>2</sub> | Male   | Wild type      | 2          | 2755          | idx01_Y19_14       | F <sub>2</sub> | Female | Wild type      | 3          |
|               |                    |                |        |                |            | 3010          | idx01_Y28_15M      | F <sub>2</sub> | Male   | Yellowish      | 2          | 2756          | idx01_Y28_15       | F <sub>2</sub> | Female | Yellowish      | 3          |
|               |                    |                |        |                |            | 3012          | idx01_Y29_16M      | F <sub>2</sub> | Female | Yellowish      | 2          | 2757          | idx01_Y29_16       | F <sub>2</sub> | Female | Wild type      | 3          |
|               |                    |                |        |                |            | 3193          | idx05_Y01_17M      | F <sub>2</sub> | Male   | Wild type      | 2          | 2758          | idx05_Y01_17       | F <sub>2</sub> | Female | Wild type      | 3          |
|               |                    |                |        |                |            | 3194          | idx05_Y02_18M      | F <sub>2</sub> | Male   | Wild type      | 2          | 2759          | idx05_Y02_18       | F <sub>2</sub> | Female | Wild type      | 3          |
|               |                    |                |        |                |            | 3197          | idx05_Y03_19M      | F <sub>2</sub> | Male   | Wild type      | 2          | 2761*         | idx05_Y03_19       | F <sub>2</sub> | Female | Wild type      | 3          |
|               |                    |                |        |                |            | 3199          | idx05_Y04_20M      | F <sub>2</sub> | Male   | Wild type      | 2          | 2762*         | idx05_Y04_20       | F <sub>2</sub> | Female | Wild type      | 3          |
|               |                    |                |        |                |            | 3203          | idx05_Y05_21M      | F <sub>2</sub> | Male   | Yellowish      | 2          | 2763          | idx05_Y05_21       | F <sub>2</sub> | Female | Wild type      | 3          |
|               |                    |                |        |                |            | 3204          | idx05_Y06_22M      | F <sub>2</sub> | Male   | Wild type      | 2          | 2764          | idx05_Y06_22       | F <sub>2</sub> | Female | Yellowish      | 3          |
|               |                    |                |        |                |            | 3206          | idx05_Y07_23M      | F <sub>2</sub> | Male   | Yellowish      | 2          | 2981          | idx05_Y07_23       | F <sub>2</sub> | Female | Wild type      | 3          |
|               |                    |                |        |                |            | 3207          | idx05_Y08_24M      | F <sub>2</sub> | Male   | Yellowish      | 2          | 2987          | idx05_Y08_24       | F <sub>2</sub> | Female | Wild type      | 3          |
|               |                    |                |        |                |            | 3210          | idx05_Y09_25M      | F <sub>2</sub> | Male   | Wild type      | 2          | 2992          | idx05_Y09_25       | F <sub>2</sub> | Female | Wild type      | 3          |
|               |                    |                |        |                |            | 3213          | idx05_Y10_26M      | F <sub>2</sub> | Male   | Yellowish      | 2          | 2993*         | idx05_Y10_26       | F <sub>2</sub> | Female | Yellowish      | 3          |
|               |                    |                |        |                |            | 3214          | idx05_Y13_27M      | F <sub>2</sub> | Male   | Wild type      | 2          | 2994*         | idx05_Y13_27       | F <sub>2</sub> | Female | Wild type      | 3          |
|               |                    |                |        |                |            | 3215          | idx05_Y17_28M      | F <sub>2</sub> | Male   | Yellowish      | 2          | 2995          | idx05_Y17_28       | F <sub>2</sub> | Female | Yellowish      | 3          |
|               |                    |                |        |                |            | 3216          | idx05_Y18_29M      | F <sub>2</sub> | Male   | Wild type      | 2          | 2997          | idx05_Y18_29       | F <sub>2</sub> | Female | Wild type      | 3          |
|               |                    |                |        |                |            | 3217          | idx05_Y19_30M      | F <sub>2</sub> | Male   | Wild type      | 2          | 2998          | idx05_Y19_30       | F <sub>2</sub> | Female | Wild type      | 3          |
|               |                    |                |        |                |            | 3219          | idx05_Y28_31M      | F <sub>2</sub> | Male   | Wild type      | 2          | 2999          | idx05_Y28_31       | F <sub>2</sub> | Female | Wild type      | 3          |
|               |                    |                |        |                |            | 3221*         | idx05_Y29_32M      | F <sub>2</sub> | Male   | Wild type      | 2          | 3000          | idx05_Y29_32       | F <sub>2</sub> | Female | Wild type      | 3          |
|               |                    |                |        |                |            | 3388          | idx06_Y01_33M      | F <sub>2</sub> | Male   | Wild type      | 2          | 3001          | idx06_Y01_33       | F <sub>2</sub> | Female | Wild type      | 3          |
|               |                    |                |        |                |            | 3390          | idx06_Y02_34M      | F <sub>2</sub> | Male   | Wild type      | 2          | 3002          | idx06_Y02_34       | F <sub>2</sub> | Female | Wild type      | 3          |
|               |                    |                |        |                |            | 3393          | idx06_Y03_35M      | F <sub>2</sub> | Male   | Yellowish      | 2          | 3006*         | idx06_Y03_35       | F <sub>2</sub> | Female | Wild type      | 3          |
|               |                    |                |        |                |            | 3401          | idx06_Y04_36M      | F <sub>2</sub> | Male   | Wild type      | 2          | 3007          | idx06_Y04_36       | F <sub>2</sub> | Female | Wild type      | 3          |
|               |                    |                |        |                |            | 3405          | idx06_Y05_37M      | F <sub>2</sub> | Male   | Wild type      | 2          | 3008          | idx06_Y05_37       | F <sub>2</sub> | Female | Wild type      | 3          |
|               |                    |                |        |                |            | 3406          | idx06_Y06_38M      | F <sub>2</sub> | Male   | Wild type      | 2          | 3013          | idx06_Y06_38       | F <sub>2</sub> | Female | Wild type      | 3          |
|               |                    |                |        |                |            | 3413          | idx06_Y07_39M      | F <sub>2</sub> | Male   | Wild type      | 2          | 3195          | idx06_Y07_39       | F <sub>2</sub> | Female | Wild type      | 3          |
|               |                    |                |        |                |            | 3531          | idx06_Y08_40M      | F <sub>2</sub> | Male   | Wild type      | 2          | 3196          | idx06_Y08_40       | F <sub>2</sub> | Female | Wild type      | 3          |
|               |                    |                |        |                |            | 3533          | idx06_Y09_41M      | F <sub>2</sub> | Male   | Yellowish      | 2          | 3198          | idx06_Y09_41       | F <sub>2</sub> | Female | Yellowish      | 3          |
|               |                    |                |        |                |            | 3534          | idx06_Y10_42M      | F <sub>2</sub> | Male   | Wild type      | 2          | 3200          | idx06_Y10_42       | F <sub>2</sub> | Female | Yellowish      | 3          |
|               |                    |                |        |                |            | 3536          | idx06_Y13_43M      | F <sub>2</sub> | Male   | Wild type      | 2          | 3201          | idx06_Y13_43       | F <sub>2</sub> | Female | Yellowish      | 3          |
|               |                    |                |        |                |            | 3539          | idx06_Y17_44M      | F <sub>2</sub> | Male   | Wild type      | 2          | 3209          | idx06_Y17_44       | F <sub>2</sub> | Female | Yellowish      | 3          |
|               |                    |                |        |                |            | 3540          | idx06_Y18_45M      | F <sub>2</sub> | Male   | Wild type      | 2          | 3211          | idx06_Y18_45       | F <sub>2</sub> | Female | Wild type      | 3          |
|               |                    |                |        |                |            | 3541          | idx06_Y19_46M      | F <sub>2</sub> | Male   | Wild type      | 2          | 3385          | idx06_Y19_46       | F <sub>2</sub> | Female | Wild type      | 3          |
|               |                    |                |        |                |            | 3543          | idx06_Y28_47M      | F <sub>2</sub> | Male   | Wild type      | 2          | 3389          | idx06_Y28_47       | F <sub>2</sub> | Female | Yellowish      | 3          |
|               |                    |                |        |                |            | 3544          | idx06_Y29_48M      | F <sub>2</sub> | Male   | Yellowish      | 2          | 3392          | idx06_Y29_48       | F <sub>2</sub> | Female | Yellowish      | 3          |
|               |                    |                |        |                |            | 3545          | idx08_Y01_49M      | F <sub>2</sub> | Male   | Yellowish      | 2          | 3394          | idx08_Y01_49       | F <sub>2</sub> | Female | Wild type      | 3          |
|               |                    |                |        |                |            | 3546          | idx08_Y02_50M      | F <sub>2</sub> | Male   | Wild type      | 2          | 3395          | idx08_Y02_50       | F <sub>2</sub> | Female | Wild type      | 3          |
|               |                    |                |        |                |            | 3547          | idx08_Y03_51M      | F <sub>2</sub> | Male   | Wild type      | 2          | 3396          | idx08_Y03_51       | F <sub>2</sub> | Female | Wild type      | 3          |
|               |                    |                |        |                |            | 3548          | idx08_Y04_52M      | F <sub>2</sub> | Male   | Wild type      | 2          | 3397          | idx08_Y04_52       | F <sub>2</sub> | Female | Wild type      | 3          |
|               |                    |                |        |                |            | 3549          | idx08_Y05_53M      | F <sub>2</sub> | Male   | Wild type      | 2          | 3398          | idx08_Y05_53       | F <sub>2</sub> | Female | Wild type      | 3          |
|               |                    |                |        |                |            | 3550          | idx08_Y06_54M      | F <sub>2</sub> | Male   | Wild type      | 2          | 3400          | idx08_Y06_54       | F <sub>2</sub> | Female | Wild type      | 3          |
|               |                    |                |        |                |            | 3552          | idx08_Y07_55M      | F <sub>2</sub> | Male   | Wild type      | 2          | 3402          | idx08_Y07_55       | F <sub>2</sub> | Female | Wild type      | 3          |
|               |                    |                |        |                |            | 3554*         | idx08_Y08_56M      | F <sub>2</sub> | Male   | Yellowish      | 2          | 3403          | idx08_Y08_56       | F <sub>2</sub> | Female | Wild type      | 3          |
|               |                    |                |        |                |            | 3798          | idx08_Y09_57M      | F <sub>2</sub> | Male   | Wild type      | 2          | 3404          | idx08_Y09_57       | F <sub>2</sub> | Female | Yellowish      | 3          |
|               |                    |                |        |                |            | 3799          | idx08_Y10_58M      | F <sub>2</sub> | Male   | Wild type      | 2          | 3407          | idx08_Y10_58       | F <sub>2</sub> | Female | Yellowish      | 3          |
|               |                    |                |        |                |            | 3801          | idx08_Y13_59M      | F <sub>2</sub> | Male   | Yellowish      | 2          | 3408          | idx08_Y13_59       | F <sub>2</sub> | Female | Wild type      | 3          |
|               |                    |                |        |                |            | 3802          | idx08_Y17_60M      | F <sub>2</sub> | Male   | Wild type      | 2          | 3409          | idx08_Y17_60       | F <sub>2</sub> | Female | Yellowish      | 3          |
|               |                    |                |        |                |            | 3806          | idx08_Y18_61M      | F <sub>2</sub> | Male   | Wild type      | 2          | 3411          | idx08_Y18_61       | F <sub>2</sub> | Female | Wild type      | 3          |
|               |                    |                |        |                |            | 3810          | idx08_Y19_62M      | F <sub>2</sub> | Male   | Wild type      | 2          | 3412          | idx08_Y19_62       | F <sub>2</sub> | Female | Wild type      | 3          |
|               |                    |                |        |                |            | 3812          | idx08_Y28_63M      | F <sub>2</sub> | Male   | Wild type      | 2          | 3414          | idx08_Y28_63       | F <sub>2</sub> | Female | Wild type      | 3          |
|               |                    |                |        |                |            | 3813          | idx08_Y29_64M      | F <sub>2</sub> | Male   | Yellowish      | 2          | 3415          | idx08_Y29_64       | F <sub>2</sub> | Female | Wild type      | 3          |
|               |                    |                |        |                |            | 3816          | idx11_Y01_65M      | F <sub>2</sub> | Male   | Wild type      | 2          | 3530          | idx11_Y01_65       | F <sub>2</sub> | Female | Wild type      | 3          |
|               |                    |                |        |                |            | 3817          | idx11_Y02_66M      | F <sub>2</sub> | Male   | Wild type      | 2          | 3532          | idx11_Y02_66       | F <sub>2</sub> | Female | Wild type      | 3          |
|               |                    |                |        |                |            | 3822          | idx11_Y03_67M      | F <sub>2</sub> | Male   | Wild type      | 2          | 3535          | idx11_Y03_67       | F <sub>2</sub> | Female | Wild type      | 3          |
|               |                    |                |        |                |            | 3824          | idx11_Y04_68M      | F <sub>2</sub> | Male   | Wild type      | 2          | 3538          | idx11_Y04_68       | F <sub>2</sub> | Female | Yellowish      | 3          |
|               |                    |                |        |                |            | 4010          | idx11_Y05_69M      | F <sub>2</sub> | Male   | Wild type      | 2          | 3542          | idx11_Y05_69       | F <sub>2</sub> | Female | Wild type      | 3          |
|               |                    |                |        |                |            | 4011*         | idx11_Y06_70M      | F <sub>2</sub> | Male   | Wild type      | 2          | 3551          | idx11_Y06_70       | F <sub>2</sub> | Female | Wild type      | 3          |
|               |                    |                |        |                |            | 4014          | idx11_Y07_71M      | F <sub>2</sub> | Male   | Wild type      | 2          | 3800          | idx11_Y07_71       | F <sub>2</sub> | Female | Wild type      | 3          |
|               |                    |                |        |                |            | 4015          | idx11_Y08_72M      | F <sub>2</sub> | Male   | Wild type      | 2          | 3804          | idx11_Y08_72       | F <sub>2</sub> | Female | Yellowish      | 3          |
|               |                    |                |        |                |            | 4017          | idx11_Y09_73M      | F <sub>2</sub> | Male   | Wild type      | 2          | 3805          | idx11_Y09_73       | F <sub>2</sub> | Female | Yellowish      | 3          |
|               |                    |                |        |                |            | 4019          | idx11_Y10_74M      | F <sub>2</sub> | Male   | Yellowish      | 2          | 3808          | idx11_Y10_74       | F <sub>2</sub> | Female | Wild type      | 3          |
|               |                    |                |        |                |            | 4023          | idx11_Y13_75M      | F <sub>2</sub> | Male   | Yellowish      | 2          | 3811          | idx11_Y13_75       | F <sub>2</sub> | Female | Wild type      | 3          |
|               |                    |                |        |                |            | 4024          | idx11_Y17_76M      | F <sub>2</sub> | Male   | Wild type      | 2          | 3814          | idx11_Y17_76       | F <sub>2</sub> | Female | Yellowish      | 3          |
|               |                    |                |        |                |            | 4025          | idx11_Y18_77M      | F <sub>2</sub> | Male   | Wild type      | 2          | 3815          | idx11_Y18_77       | F <sub>2</sub> | Female | Wild type      | 3          |
|               |                    |                |        |                |            | 4031          | idx11_Y19_78M      | F <sub>2</sub> | Male   | Wild type      | 2          | 3818          | idx11_Y19_78       | F <sub>2</sub> | Female | Wild type      | 3          |
|               |                    |                |        |                |            | 4032          | idx11_Y28_79M      | F <sub>2</sub> | Male   | Wild type      | 2          | 3820          | idx11_Y28_79       | F <sub>2</sub> | Female | Wild type      | 3          |
|               |                    |                |        |                |            | 4033          | idx11_Y29_80M      | F <sub>2</sub> | Male   | Wild type      | 2          | 3821          | idx11_Y29_80       | F <sub>2</sub> | Female | Wild type      | 3          |
|               |                    |                |        |                |            | 4037*         | idx12_Y01_81M      | F <sub>2</sub> | Male   | Wild type      | 2          | 3823          | idx12_Y01_81       | F <sub>2</sub> | Female | Wild type      | 3          |
|               |                    |                |        |                |            | 4038*         | idx12_Y02_82M      | F <sub>2</sub> | Male   | Wild type      | 2          | 4012          | idx12_Y02_82       | F <sub>2</sub> | Female | Wild type      | 3          |
|               |                    |                |        |                |            | 4168          | idx12_Y03_83M      | F <sub>2</sub> | Male   | Yellowish      | 2          | 4013          | idx12_Y03_83       | F <sub>2</sub> | Female | Wild type      | 3          |
|               |                    |                |        |                |            | 4169          | idx12_Y04_84M      | F <sub>2</sub> | Male   | Wild type      | 2          | 4018          | idx12_Y04_84       | F <sub>2</sub> | Female | Wild type      | 3          |
|               |                    |                |        |                |            | 4170          | idx12_Y05_85M      | F <sub>2</sub> | Male   | Wild type      | 2          | 4022          | idx12_Y05_85       | F <sub>2</sub> | Female | Wild type      | 3          |
|               |                    |                |        |                |            | 4171          | idx12_Y06_86M      | F <sub>2</sub> | Male   | Wild type      | 2          | 4027          | idx12_Y06_86       | F <sub>2</sub> | Female | Wild type      | 3          |
|               |                    |                |        |                |            | 4173          | idx12_Y07_87M      | F <sub>2</sub> | Male   | Yellowish      | 2          | 4028          | idx12_Y07_87       | F <sub>2</sub> | Female | Yellowish      | 3          |
|               |                    |                |        |                |            | 4174          | idx12_Y08_88M      | F <sub>2</sub> | Male   | Wild type      | 2          | 4030          | idx12_Y08_88       | F <sub>2</sub> |        |                |            |

Table S6. Sequences of P1 and P2 adaptors.

| P1 adaptor       | Nucleotide sequence                                   |
|------------------|-------------------------------------------------------|
| GCATG_EcoRI_P1.1 | 5' ACACTCTTTCCCTACACGACGCTCTTCCGATCTGCATG 3'          |
| AACCA_EcoRI_P1.1 | 5' ACACTCTTTCCCTACACGACGCTCTTCCGATCTAACCA 3'          |
| CGATC_EcoRI_P1.1 | 5' ACACTCTTTCCCTACACGACGCTCTTCCGATCTCGATC 3'          |
| TCGAT_EcoRI_P1.1 | 5' ACACTCTTTCCCTACACGACGCTCTTCCGATCTTCGAT 3'          |
| TGCAT_EcoRI_P1.1 | 5' ACACTCTTTCCCTACACGACGCTCTTCCGATCTTGCAT 3'          |
| CAACC_EcoRI_P1.1 | 5' ACACTCTTTCCCTACACGACGCTCTTCCGATCTCAACC 3'          |
| GGTTG_EcoRI_P1.1 | 5' ACACTCTTTCCCTACACGACGCTCTTCCGATCTGGTTG 3'          |
| AAGGA_EcoRI_P1.1 | 5' ACACTCTTTCCCTACACGACGCTCTTCCGATCTAAGGA 3'          |
| AGCTA_EcoRI_P1.1 | 5' ACACTCTTTCCCTACACGACGCTCTTCCGATCTAGCTA 3'          |
| ACACA_EcoRI_P1.1 | 5' ACACTCTTTCCCTACACGACGCTCTTCCGATCTACACA 3'          |
| ACTGG_EcoRI_P1.1 | 5' ACACTCTTTCCCTACACGACGCTCTTCCGATCTACTGG 3'          |
| ATTAC_EcoRI_P1.1 | 5' ACACTCTTTCCCTACACGACGCTCTTCCGATCTATTAC 3'          |
| CATAT_EcoRI_P1.1 | 5' ACACTCTTTCCCTACACGACGCTCTTCCGATCTCATAT 3'          |
| CGAAT_EcoRI_P1.1 | 5' ACACTCTTTCCCTACACGACGCTCTTCCGATCTCGAAT 3'          |
| GACAC_EcoRI_P1.1 | 5' ACACTCTTTCCCTACACGACGCTCTTCCGATCTGACAC 3'          |
| GAGAT_EcoRI_P1.1 | 5' ACACTCTTTCCCTACACGACGCTCTTCCGATCTGAGAT 3'          |
| GCATG_EcoRI_P1.2 | 5' Phos-AATTCATGCAGATCGGAAGAGCGTCGTGTAGGGAAAGAGTGT 3' |
| AACCA_EcoRI_P1.2 | 5' Phos-AATTTGGTTAGATCGGAAGAGCGTCGTGTAGGGAAAGAGTGT 3' |
| CGATC_EcoRI_P1.2 | 5' Phos-AATTGATCGAGATCGGAAGAGCGTCGTGTAGGGAAAGAGTGT 3' |
| TCGAT_EcoRI_P1.2 | 5' Phos-AATTATCGAAGATCGGAAGAGCGTCGTGTAGGGAAAGAGTGT 3' |
| TGCAT_EcoRI_P1.2 | 5' Phos-AATTATGCAAGATCGGAAGAGCGTCGTGTAGGGAAAGAGTGT 3' |
| CAACC_EcoRI_P1.2 | 5' Phos-AATTGGTTGAGATCGGAAGAGCGTCGTGTAGGGAAAGAGTGT 3' |
| GGTTG_EcoRI_P1.2 | 5' Phos-AATTCAACCAGATCGGAAGAGCGTCGTGTAGGGAAAGAGTGT 3' |
| AAGGA_EcoRI_P1.2 | 5' Phos-AATTTCCCTAGATCGGAAGAGCGTCGTGTAGGGAAAGAGTGT 3' |
| AGCTA_EcoRI_P1.2 | 5' Phos-AATTTAGCTAGATCGGAAGAGCGTCGTGTAGGGAAAGAGTGT 3' |
| ACACA_EcoRI_P1.2 | 5' Phos-AATTTGTGTAGATCGGAAGAGCGTCGTGTAGGGAAAGAGTGT 3' |
| ACTGG_EcoRI_P1.2 | 5' Phos-AATTCCAGTAGATCGGAAGAGCGTCGTGTAGGGAAAGAGTGT 3' |
| ATTAC_EcoRI_P1.2 | 5' Phos-AATTGTAATAGATCGGAAGAGCGTCGTGTAGGGAAAGAGTGT 3' |
| CATAT_EcoRI_P1.2 | 5' Phos-AATTATATGAGATCGGAAGAGCGTCGTGTAGGGAAAGAGTGT 3' |
| CGAAT_EcoRI_P1.2 | 5' Phos-AATTATTCGAGATCGGAAGAGCGTCGTGTAGGGAAAGAGTGT 3' |
| GACAC_EcoRI_P1.2 | 5' Phos-AATTGTGTCAGATCGGAAGAGCGTCGTGTAGGGAAAGAGTGT 3' |
| GAGAT_EcoRI_P1.2 | 5' Phos-AATTATCTCAGATCGGAAGAGCGTCGTGTAGGGAAAGAGTGT 3' |
| P2 adaptor       | Sequence                                              |
| MseI_P2.1        | 5' GTGACTGGAGTTCAGACGTGTGCTCTTCCGATCT 3'              |
| MseI_P2.2        | 5' Phos-TAAGATCGGAAGAGCGAGAACAA 3'                    |

Phos, phosphorylated.

Table S7. Sequences of PCR primers for ddRAD-seq.

| Name               | Nucleotide sequence                                          |
|--------------------|--------------------------------------------------------------|
| PCR1               | 5' AATGATACGGCGACCACCGAGATCTACACTCTTCCCTACACGACG 3'          |
| PCR2_Idx_1_ATCACG  | 5' CAAGCAGAAGACGGCATAACGAGATCGTGATGTGACTGGAGTTCAGACGTGTGC 3' |
| PCR2_Idx_5_ACAGTG  | 5' CAAGCAGAAGACGGCATAACGAGATCACTGTGTGACTGGAGTTCAGACGTGTGC 3' |
| PCR2_Idx_6_GCCAAT  | 5' CAAGCAGAAGACGGCATAACGAGATATTGGCGTGACTGGAGTTCAGACGTGTGC 3' |
| PCR2_Idx_8_ACTTGA  | 5' CAAGCAGAAGACGGCATAACGAGATTCAAGTGTGACTGGAGTTCAGACGTGTGC 3' |
| PCR2_Idx_11_GGCTAC | 5' CAAGCAGAAGACGGCATAACGAGATGTAGCCGTGACTGGAGTTCAGACGTGTGC 3' |
| PCR2_Idx_12_CTTGTA | 5' CAAGCAGAAGACGGCATAACGAGATTACAAGGTGACTGGAGTTCAGACGTGTGC 3' |

PCR1 contains a sequence complimentary to P1 adaptor sequences and the others to P2 adaptor sequences. The last six characters in the names of PCR2 primers show nucleotide sequences of PCR indexes.

Table S8. Sequences of primers used for direct sequencing, PCR-RFLP, and real time PCR.

| Name of primer or primer pair | Name of oligonucleotide | Purpose                                     | Nucleotide sequence            | Length (nt) | T <sub>m</sub> | T <sub>a</sub> | Product length (bp) |
|-------------------------------|-------------------------|---------------------------------------------|--------------------------------|-------------|----------------|----------------|---------------------|
| pmel_1                        | pmel_1_24Fw             | Amplification of cDNA and direct sequencing | 5' CTTTGCCTCTCTCGGAGTCGGAG 3'  | 23          | 63.1           | 60             | 1,369               |
|                               | pmel_1_1368Rv           |                                             | 5' CATCCACTTCCACATCTGCAGCA 3'  | 24          | 61.3           |                |                     |
| pmel_2                        | pmel_2_1024Fw           | Amplification of cDNA and direct sequencing | 5' CTCCTTGGGACCTACAGCTACAC 3'  | 23          | 61.3           | 60             | 1,472               |
|                               | pmel_2_2353Rv           |                                             | 5' AGTCTTTATTAGCAGCCAGTACAC 3' | 25          | 56.3           |                |                     |
| —                             | pmel-seq_176Rv          | Direct sequencing                           | 5' CCGTCCCCTCCTTCCACG 3'       | 18          | 61.7           | —              | —                   |
| —                             | pmel_3_1683Fw           | Direct sequencing                           | 5' CTGTATCGCTATGGCTCCTTCTC 3'  | 23          | 59.6           | —              | —                   |
| pmel_RFLP                     | pmel_RFLP-F             | PCR-RFLP                                    | 5' CAAAGCCACCTTCTCCATCTCTC 3'  | 23          | 60.9           | 55             | 445                 |
|                               | pmel_RFLP-R             |                                             | 5' CATCCGTCCTACTGTCAGCTTC 3'   | 23          | 62.6           |                |                     |
| pmel_mRNA_RT-PCR5             | pmel_mRNA_RT-PCR5_Fw    | Real time PCR                               | 5' ATCAGCAACGACGCTCCCA 3'      | 19          | 57.3           | 60             | 139                 |
|                               | pmel_mRNA_RT-PCR5_Rv    |                                             | 5' CCATGTGGGTGCCGTTAACG 3'     | 20          | 59.5           |                |                     |
| chick-actb                    | chick-actb_Fw           | Real time PCR                               | 5' GCTACAGCTTACCACCACA 3'      | 23          | 59.6           | 60             | 90                  |
|                               | chick-actb_Rv           |                                             | 5' TCTCCTGCTCGAAATCCAGT 3'     | 23          | 57.8           |                |                     |

T<sub>m</sub>, melting temperature (°C); T<sub>a</sub>, annealing temperature (°C).

Thermocycling for amplification of *PMEL* cDNA: 2 min at 94°C and 45 cycles of (10 sec at 98°C, 30 sec at 60°C and 30 sec/kb at 68°C).

Thermocycling for amplification for PCR-RFLP: 5 min at 95°C and 40 cycles of (30 sec at 95°C, 30 sec at 55°C, and 60 sec at 72°C).

Thermocycling for real time PCR: 10 min at 95°C, 40 cycles of (15 sec at 95°C and 1 min at 60°C), 15 sec at 95°C, 1 min at 60°C, and 15 sec at 95°C.

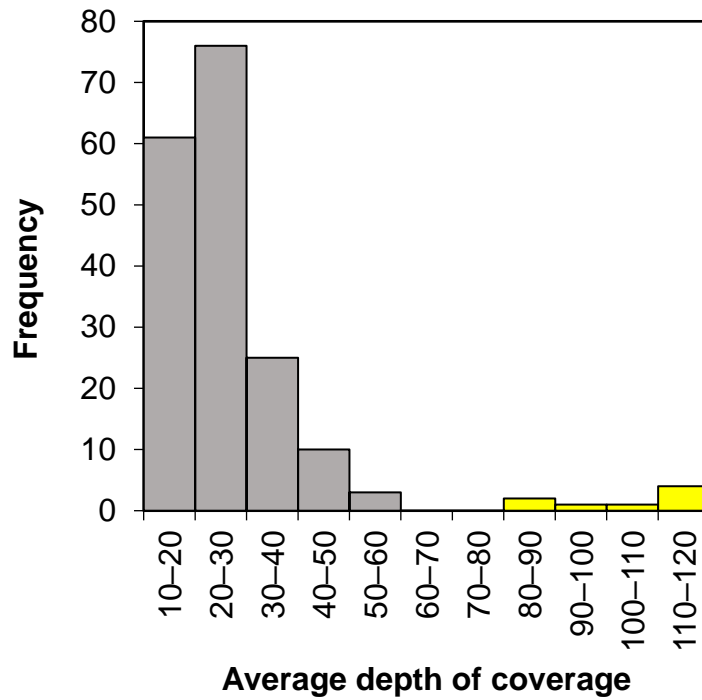

**Figure S1. Distribution of average coverage depth of SNP markers.** Yellow bars represent two parent samples that were analysed in both the first and second sequencing, and six samples of F<sub>2</sub> offspring that were analysed in the first sequencing. Grey bars represent 190 samples of F<sub>2</sub> offspring that were analysed in either the second or third sequencing. The median of the average coverage depth is 108.8× in samples represented by yellow bars and 23.1× in samples represented by grey bars.

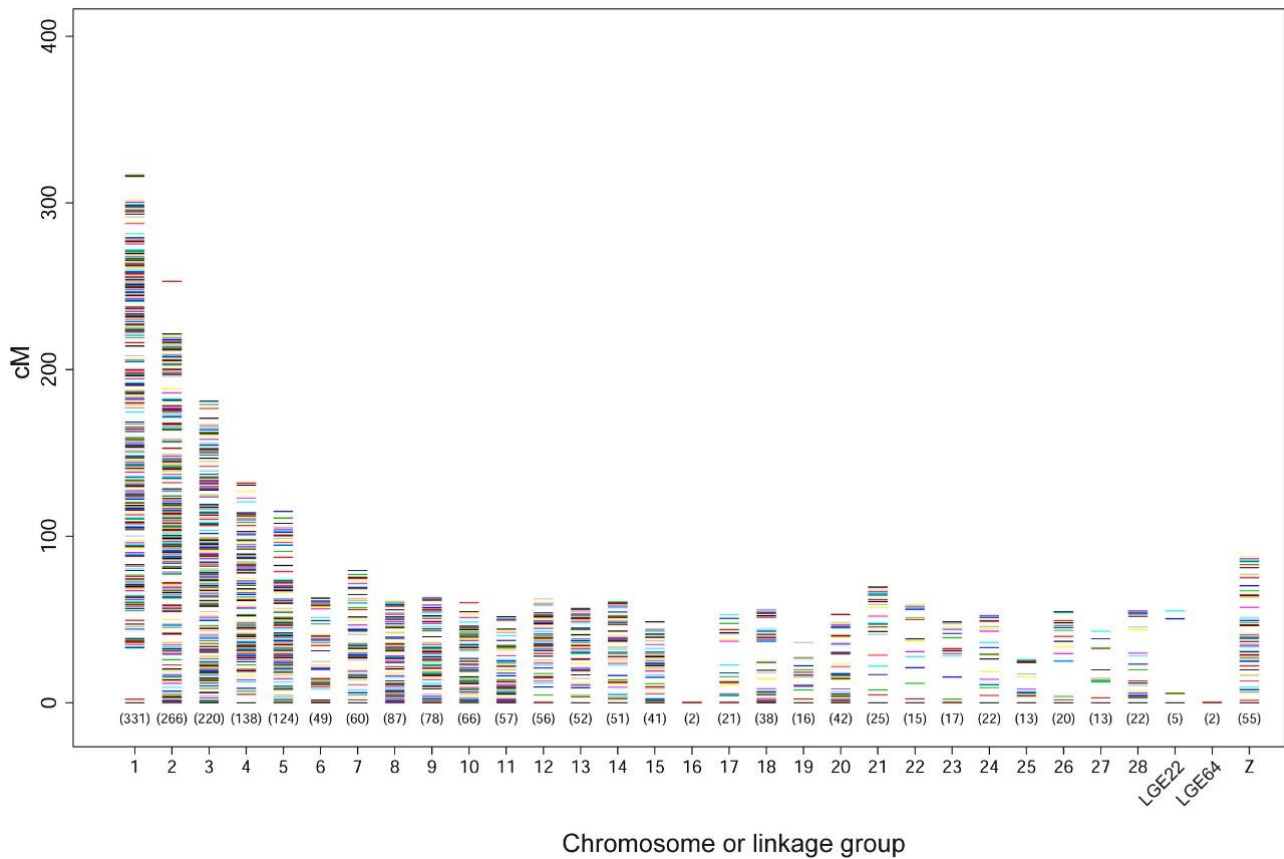

**Figure S2. Genetic map constructed with 2,004 SNP markers.** The horizontal axis represents chromosomes or linkage groups. The vertical axis represents genetic distance (cM). Each coloured line represents a SNP marker. Numerical values in parenthesis at the bottom indicate the total number of SNP markers in each chromosome or linkage group.

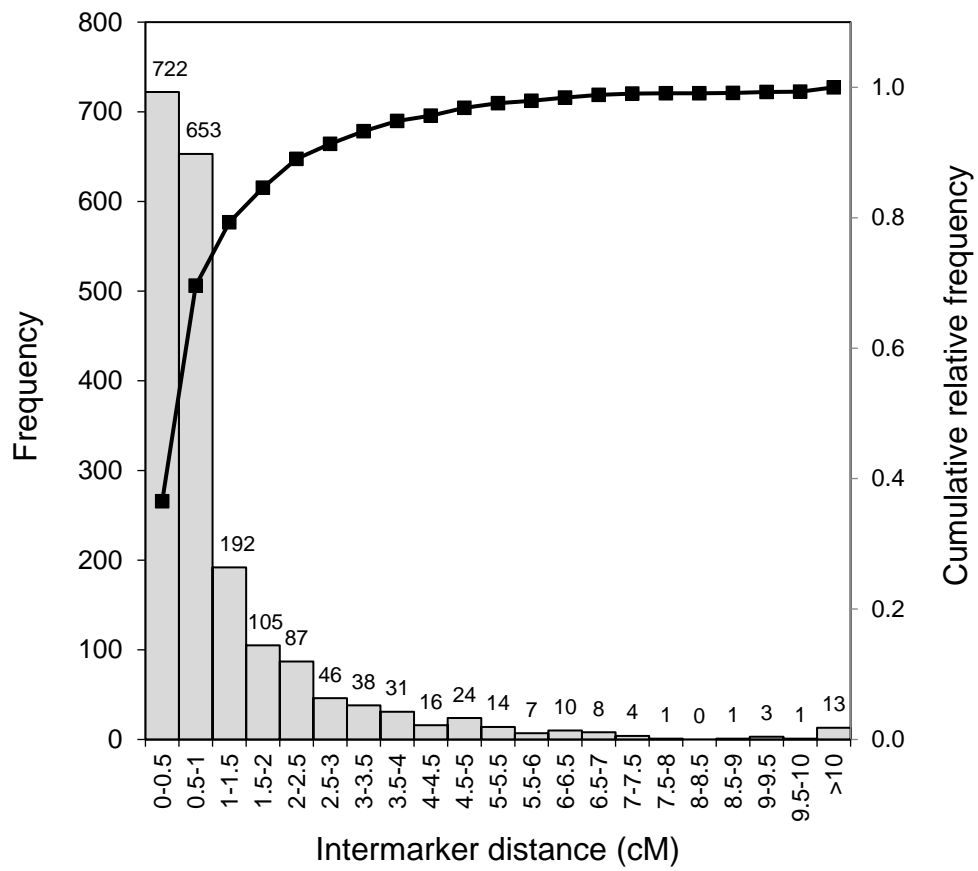

**Figure S3. Distribution of intermarker distance in the genetic map.** Histogram shows the frequency of each intermarker distance. Dots show the cumulative relative frequency of each intermarker distance.



```

10 20 30 40 50 60 70 80 90 100 110 120 130
WE ATGCGGTTACACGGGGCCATCTGCTGCTGGCGGCACCTGCTGGCCCTGACCAAGCCGACAGCAGCAGGCGGGCGTGGAAACCCGGTCCGCTTCAGGGTCCGCTGTGGGTGGCCGCCGACGCCCTTCA
L .....

140 150 160 170 180 190 200 210 220 230 240 250 260
WE GGAGCTGGGATCGACCCCGGTACCGCCCTGGAAGGAGGGGACGGCCAGCAAGCGACTGCTGGCAGGAGGCGATGTCACTTCGACATCAGCAACGACGCTCCACCATGGCCGGAGCCAAAGCCAC
L .....T.....G.....

270 280 290 300 310 320 330 340 350 360 370 380 390
WE TTTCTCCATCGCTGCGCTTCCCCAGCACTCAGAGGGCGCTGCCCGACGGCCCGTGGTCTGGAAGCAGAACTGCACCGTTAACGGCACCCGCATGGTGCAGGGGGACCCGGTTCGCCGGAGCAGCTG
L .....T.....A.....A.....

400 410 420 430 440 450 460 470 480 490 500 510 520
WE GTTGAGGTTCCGATGGCTCTTCCCCAGCGGGCAGCCCTTCCCCCGCAGCTCCTGGGGCAAAACAGGAGAGATTGCTATGTCTGGTGGACTTGGGGCATTACTGGCAGGTGGTGGATGGGGCGGCAT
L .....A.....

530 540 550 560 570 580 590 600 610 620 630 640 650
WE CGAAGCTGACAGTGGGACGATGGGGTGGCCCTGGGCTCCTACCCATGGAGTGGTGGTTTATCATTACCTGGCCGCCAGAGTTCATCCCATCGGCCAGCCAGCAGCAGTTGAGCATCACAGA
L .....T.....

660 670 680 690 700 710 720 730 740 750 760 770 780
WE CCAGTGCCTATGCACTGATGACACAGCTGGAAGTGGCAACAGGGGACGGCCGGGCGTTCGTACTCAACACCCCGTGGCCTCAACGTGAGGCTGCACAGCCCGCATTACTGCTGATGCT
L .....

790 800 810 820 830 840 850 860 870 880 890 900 910
WE GACATCTCCTATTCTGGGATTTGGGGACAGAGTGGGACGCTCATCTCCCGCAGCCCACTGACCCACACCTACCTGCAGGCTGGTCCCTTCTGCGCCGCCTGGTCTGCAGGCAGCATCCAC
L .....C.....C.....

920 930 940 950 960 970 980 990 1000 1010 1020 1030 1040
WE TCGGCTCCTCGGCCCTCTGACAGCCCTGTGTGGATCCCAACAGGGGTCAGTGCCTCCTTGGGACCCAGACTACAGGCTGTGGTCCCACTGGATCCGGCACTGCTGCAGATCCAGCAGCTCC
L .....C.G.....T.....C.....C.....

1050 1060 1070 1080 1090 1100 1110 1120 1130 1140 1150 1160 1170
WE CACAGCACCCGGAACACATGCAGCACCCGACGCTCTGGAGCACCAGCAGAAACCCAGGGGGTCTCAGTGGTGTGCTTCAGACAGCGTGCACATGAGCCATCCCTGACCCGGTCTCAGCAGCTGGT
L .....G.....A.....C.....

1180 1190 1200 1210 1220 1230 1240 1250 1260 1270 1280 1290 1300
WE GCAGCAGCCATACAGACCCCACTGCAGACCCCACTGCCCACTCAGTCTCCTCAGTGGGATGCTCCGGGCACCTGGACCCCAAGCAGTGGAAAGGAGCGTGGCAGCAGGTGTGGGGGACGCCA
L ..G.....T.....G.....A.....

1310 1320 1330 1340 1350 1360 1370 1380 1390 1400 1410 1420 1430
WE CCCCTGGAGCCACTGCTGCAGATGGAAGTGGATGCAGCTGGACCCACAGCTGGAGCCACAGCTGGAACCATGGCAGATCCACAGCTGGAATAATGGCAGATGCCCGGCTGGAGCCACAGCTCAATC
L .....A.....A.....

1440 1450 1460 1470 1480 1490 1500 1510 1520 1530 1540 1550 1560
WE CATGGCAGAGCCACAGCTGGAGC-----CACAGCTGGAGCTATAGCAGATCCACAGCTGGAGCCACAGCTGGAGCTATAGCAGATCCACAGCTGGAGCTATAGCAGAT
L .....G.....TATAGCAGATCCACAGCTGGAGC.....T.T..TA.ATC.C.C...T.GAG.....

1570 1580 1590 1600 1610 1620 1630 1640 1650 1660 1670 1680 1690
WE CCCACAGCTGGAATCCACAGCAGAGCCACTGCTGCTGGTGAAGCGCCAGGCAACCCAGTCCGAGCCACCCGGTGCCTCCTGTATCGCTATGGTCCCTCTCCACTGAGCTCAACGTCTCCAGGGCATCG
L .....C.....T.....A.....

1700 1710 1720 1730 1740 1750 1760 1770 1780 1790 1800 1810 1820
WE AGAACCTGGCCATTGTGCAGTGGTCCCGCAGCACCTGAGGGCAGCGGGAACAGCTGGAGCTGACGGTGCATGCGAGGGGAGCCCTCCCGAGGAGGTTTGCACCGTGGTGGCAGACGCCAGTGCCTG
L .....

1830 1840 1850 1860 1870 1880 1890 1900 1910 1920 1930 1940 1950
WE CACAGCCAGATGAGACGCTGCTCAGCCGTGGCTCCAGCACCCGGCTGCCAGCTGGTGTACCGCAGGACTTAACACCGCTCCGGTCTCTACTGCTCAATGTCTCGTTGGCCACGGCAATGGCTTGCT
L .....C.....T.....

1960 1970 1980 1990 2000 2010 2020 2030 2040 2050 2060 2070 2080
WE GTGGCCAGCACAGCTGTGGCTGTCGGAGGAGCATCCCGAGCTGCTGGTGGCACCAGCTCACAGTGGGGCTGCTGCTCATCGTTGCAGCACTGGGCCTGCTGCCTACACCTACCCCGTGTGAAGTACA
L .....A.....

2090 2100 2110 2120 2130 2140 2150 2160 2170 2180 2190 2200 2210
WE GCCCACTGCTGCCACAGCCCCAGGTAATCCCGCCACAGCTGGCTGCCCGCGGTGCTGCCCTACGCTGTTGCTACGTCAGGCTTTTGGGGGGCTCCAGTGGGGAAAGCAGCCCGCTGCTGCG
L .....GT.....A.....

2220
WE TGCCACCGCTGTCTAA
L .....

```

**Figure S4. *PMEL* coding sequences of the WE and L strains.** A total of 47 base substitutions, including G>A at the 446th nucleotide, and a single 24-bp insertion/deletion at the 1455–1478th nucleotides are present.

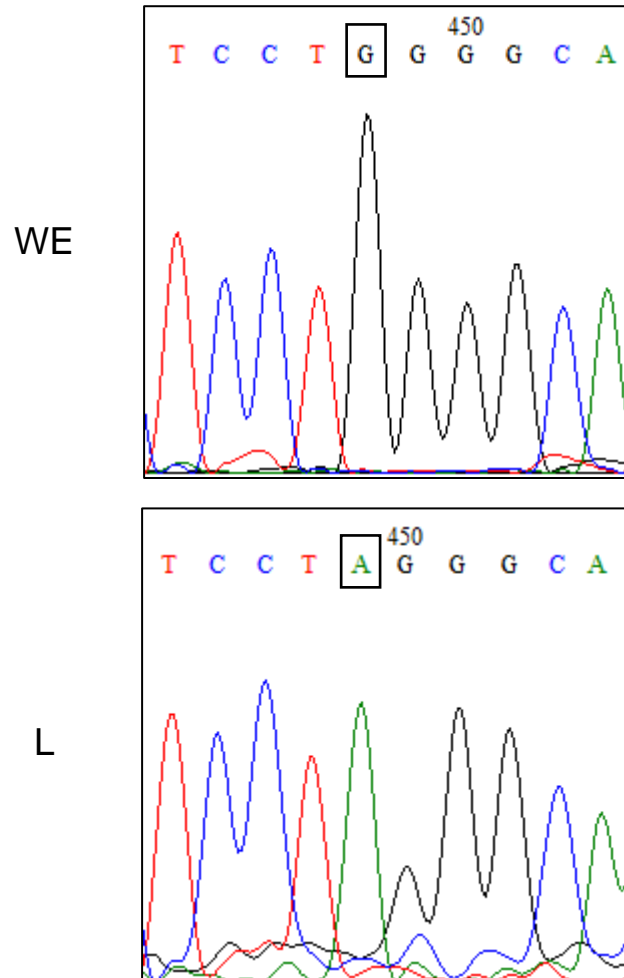

**Figure S5. ABI chromatograms of nucleotide sequences around the 446th nucleotide (squared frame) in the coding sequence of *PMEL*. The 446th nucleotide is guanine in the WE strain and adenine in the L strain.**

```

      10      20      30      40      50      60
WE  MRLHGAIIVLLAAILLALTTAQQRGGGRNRGAVQGELWGGRRPTFFRSWDATRYRFPWKEGTAQ
L  .....

      70      80      90      100     110     120
WE  QSDCWRGGDVTFDISNDAPTMAGAKATFSIALRFPSTQRALPDGRVVWKQNCITVNGTRMV
L  .....S.....H..

      130     140     150     160     170     180
WE  QGDFVTFPEQLVEGSDGVFEDGQPFPRSSWGKRGRFVYVWWTWGHYWQVVDGAASKLTVGT
L  .....*

      190     200     210     220     230     240
WE  DGVALGSYTMVVVYHYRGRQKFIPIGHASTQFSITDQVPIAVDVTQLEVATGDGGRFVL
L  .....

      250     260     270     280     290     300
WE  NHFVAFNVRLHDP SHYL RDADISYSWDFGDQSGTLISRSPITVTHTYLQAGSFAARLVLQA
L  .....

      310     320     330     340     350     360
WE  AIFLGSCGTSAAFPVVDPTTGSVPSLGPATATEFVGP TGSGTAAASSTPTAPGTTAAAPAASG
L  .....

      370     380     390     400     410     420
WE  APAEPTGVSVVVPSDSAATEPIPFVVLSTGAAANTDPTADPQSPTSVS SGGDAPGIVDPT
L  .....

      430     440     450     460     470     480
WE  AVEGSVAAGVGAATPGATAADVEVDAAGPTAGATAGTMADSTAGIMADATAGATAQSMAE
L  .....

      490     500     510     520     530     540
WE  ATAGATAGAIADPTAGATAGAIADPTAGAIADPTAGSTAEPLLLVKRQAPESEPTGCVLY
L  .....

      550     560     570     580     590     600
WE  RYGSFSTELNVVQGIENVAIVQVVPAAPEGSGNSVELTVTCESLPEEVCTVVA DAECRT
L  .....

      610     620     630     640     650     660
WE  AQMQTCSAVAPAPGCQLVLRQDFNQSGLYCLNVSLANGNGLAVASTRVAVGGASPAAGGT
L  .....

      670     680     690     700     710     720
WE  TLTVGLLLIIVAALGTAAYTYRRVKYSPELLPTAPQVSRPHSWLPPGAALRILLRQAFGGAP
L  .....

      730
WE  SGESSPLL RANAV*
L  .....

```

**Figure S6. Amino acid sequences of PMEL in the WE and L strains.** A premature stop codon is present at the position of the 149th amino acid in the L strain. The truncated form of PMEL contains two amino acid substitutions, Ala91Ser and Arg118His.

|            |     | Signal sequence           |            |             |            |            |             |              |            |            |     |  |
|------------|-----|---------------------------|------------|-------------|------------|------------|-------------|--------------|------------|------------|-----|--|
| Quail (WE) | 1   | --                        | MRLHGAIV   | LLAALLALTT  | AQQRGGGRNR | GA         | VQGPLWGG    | RPTFFRSWDA   | TRYRPWKEGT |            | 58  |  |
| Chicken    | 1   | --                        | MRLHGAIV   | LLAALLALVT  | AQQRGGGRSR | GG         | VKGSWGG     | RPAPFRSWDT   | ARYRPWQEGT |            | 58  |  |
| Human      | 1   |                           | MDLVLKRCLL | HLAVIGALLA  | VGATKVPNRQ | DWL        | G---VS      | RQLRTKAWNR   | QLYPEWTE-- |            | 54  |  |
|            |     |                           |            |             |            |            |             |              |            |            |     |  |
| Quail (WE) | 59  |                           | AQQSDCWRRG | DVTFDISNDA  | PTMAGAKATF | SIALRFPSTQ | RALPDGRVVW  | KQNCTVNGTR   |            | 118        |     |  |
| Chicken    | 59  |                           | ARQNDCWRRG | DVTFDISNDA  | PTLVGARATF | SIALRFPSTQ | TVLPDGRVVW  | SONCTVNGTR   |            | 118        |     |  |
| Human      | 55  |                           | AQRLCDWRRG | QVSLKVSNDG  | PTLIGANASF | SIALNFPSSQ | KVLPDGRQVIW | VNNTIINGSQ   |            | 114        |     |  |
|            |     |                           |            |             |            |            |             |              |            |            |     |  |
| Quail (WE) | 119 |                           | MVQGDVPVPE | QLVEGSDGVF  | PDGQPFPRSS | WGKRGRFVYV | WWTWGHYQV   | VDGAASKLTV   |            | 178        |     |  |
| Chicken    | 119 |                           | MLQGDVPVPE | QLAEGSDGVF  | PDGQPFPRSA | WGKRGRFVYV | WWTWGRYQV   | VDGATSQLTV   |            | 178        |     |  |
| Human      | 115 |                           | VWGGQPVYPQ | ETDDAC--IF  | PDGGPCPSGS | WSQKRSFVYV | WKTWGYQVQV  | LGGPVSGLSI   |            | 172        |     |  |
|            |     |                           |            |             |            |            |             |              |            |            |     |  |
| Quail (WE) | 179 |                           | GTDGVALGSY | TMEVVVYHYR  | GRQKFIPIGH | ASTQFSITDQ | VPIAVDVTQL  | EVA          | FGDGGRE    |            | 238 |  |
| Chicken    | 179 |                           | GTDGVALGSY | TMEVVVYHYR  | GRQRFIPIGH | ASTQFSITDQ | VPIAVDVTQL  | EVAAGDGGSF   |            | 238        |     |  |
| Human      | 173 |                           | GTERAMLGTH | TMEVTVYHRR  | GSRSYVPLAH | SSSAFTITDQ | VPFVSVSQSL  | RALDGGNKHF   |            | 232        |     |  |
|            |     |                           |            |             |            |            |             |              |            |            |     |  |
|            |     | PKD domain                |            |             |            |            |             |              |            |            |     |  |
| Quail (WE) | 239 |                           | VLNHPVAENV | RLHDP SHYLR | DADISYSWDF | GDOSGTLISR | SPTVTHTYLO  | AGSFAARLVL   |            | 298        |     |  |
| Chicken    | 239 |                           | VRNRPVAFNV | RLHDP SHYLR | DADISYSWDF | GDQSGTLISR | SPTVTHTYLO  | AGSFAARLVL   |            | 298        |     |  |
| Human      | 233 |                           | LRNQPLTFAL | QLHDP SGYLA | EADLSYTWDF | GDSSGTLISR | ALVVTHTYLE  | PGPVTAQVVL   |            | 292        |     |  |
|            |     |                           |            |             |            |            |             |              |            |            |     |  |
| Quail (WE) | 299 |                           | QAAIPLGSCG | TSAAPVVDPT  | TGSVPSLGPT | ATEPVGPTGS | GTAASS---   | ---          | TPTAPGT    |            | 352 |  |
| Chicken    | 299 |                           | QAAIPLSSCG | TSAPPVVDPT  | TGPVPSLGPT | ATQPVGPTGS | GTATAPSNLT  | GSGTAAAPGT   |            | 358        |     |  |
| Human      | 293 |                           | QAAIPLTSCG | SS-----PV   | PGTDDGHRPT | AEAPN----- | TTAGQVP---  | ---          | TEVVGT     |            | 335 |  |
|            |     |                           |            |             |            |            |             |              |            |            |     |  |
| Quail (WE) | 353 |                           | TAAPAASGAP | AeptGVSVVV  | PSDSAATEPI | PDPVLSTG-- | -AAANTDPTA  | DPQSPTS SVSS |            | 409        |     |  |
| Chicken    | 359 |                           | TAAPRASGAP | AeptGVSVAV  | LSDSAATEPL | PDPVLSTAVA | DAAAAGTDPTA | DPLPPTS SVSS |            | 418        |     |  |
| Human      | 336 |                           | TPGQAPTAEP | SGTTSVQVPT  | -----TEVI  | S-----     | -----TA     | PVQMPTAEST   |            | 372        |     |  |
|            |     |                           |            |             |            |            |             |              |            |            |     |  |
| Quail (WE) | 410 |                           | GGDAPGTVDP | TAVEGSVAAG  | VG-----AA  | TPGATAADVE | VDAAG-----  | ---          | PTAGATA    |            | 455 |  |
| Chicken    | 419 |                           | GGDAPGTVAP | TAVEGSVAAG  | VGTAEDVAAA | TPGATAADVA | VDTAGATDGD  | AVGPTAAATA   |            | 478        |     |  |
| Human      | 373 |                           | G-MTPEKVPV | SEVMGTTLAE  | MS-----TPE | ATGMTPAEVS | IVVLS-----  | -----        |            | 411        |     |  |
|            |     |                           |            |             |            |            |             |              |            |            |     |  |
|            |     | Repeat 1                  |            |             |            |            | Repeat 2    |              |            |            |     |  |
| Quail (WE) | 456 |                           | GTMADSTAGI | MADATAGATA  | QSMAEATAGA | TAGAIADPTA | GATAGAIADP  | TAGA         | IADP--     |            | 513 |  |
| Chicken    | 479 |                           | ESIADPTAGA | TDGDAVGATA  | ESIADPTAGA | TDGDAVGPTA | AATAESIADP  | TAGATAVSSG   |            | 538        |     |  |
| Human      | 411 |                           | ---GTTAAQV | TTTEWVETTA  | RELPIEPEG  | PDASSIMSTE | SITG-----   | SLGPLLDG--   |            | 460        |     |  |
|            |     |                           |            |             |            |            |             |              |            |            |     |  |
|            |     | Proteolytic cleavage site |            |             |            |            |             |              |            |            |     |  |
| Quail (WE) | 513 |                           | --TAGSTAEP | LLLVKQ      | QAPE       | SEPTGCVL   | LYR         | YGSFSTELNV   | VQGIENVAIV | QVVPAAPEGS | 571 |  |
| Chicken    | 539 |                           | SATAGATAEP | LLLVKR      | QAPE       | AeptGCVL   | LYR         | YTFSTELNI    | VQGIESVAIV | QVVPAAPEGS | 598 |  |
| Human      | 460 |                           | -----TAT   | LRLVKRQVP-  | ---        | LDCVLYR    | YGSFSVTLDI  | VQGIESA EIL  | QAVPS---   | GE         | 506 |  |
|            |     |                           |            |             |            |            |             |              |            |            |     |  |
| Quail (WE) | 572 |                           | GNSVELTVTC | EGSLPEEVCT  | VVADAECRTA | QMQTCSAVAP | APGCQLVLRQ  | DFNQ-SGLYC   |            | 630        |     |  |
| Chicken    | 599 |                           | GNSVELTVTC | EGSLPEEVCT  | VVADAECRTA | QMQTCSAVAP | APGCQLVLRQ  | DFNQ-SGLYC   |            | 657        |     |  |
| Human      | 507 |                           | GDAFELTVSC | QGGLPKEACM  | EISSPGQPP  | AQRLCQPVL  | SPACQLVLHQ  | IILKGGSGTYC  |            | 566        |     |  |
|            |     |                           |            |             |            |            |             |              |            |            |     |  |
|            |     | Transmembrane domain      |            |             |            |            |             |              |            |            |     |  |
| Quail (WE) | 631 |                           | LNVSLANGNG | LAVASTRVAV  | GGASE      | AAGGT      | TLTVGLL---  | LIVAALGTAA   | YTY        | RRVKYSP    | 687 |  |
| Chicken    | 658 |                           | LNVSLANGNG | LAVASTHVAV  | GGASPAASGT | TLTVGLLWAP | LMAAALGTAA  | YTY          | RRVKYSP    |            | 717 |  |
| Human      | 567 |                           | LNVSLADTNS | LAVVSTQLIM  | PGQEA      | EAGLGQV    | PLIVGIL---  | LVLMAVVLAS   | LIYRRR---- |            | 619 |  |
|            |     |                           |            |             |            |            |             |              |            |            |     |  |
|            |     | Cytoplasmic domain        |            |             |            |            |             |              |            |            |     |  |
| Quail (WE) | 688 |                           | LLPTAPOVSR | PHSWLPPGAA  | LRLLLROAFG | GAPSGESSPL | LRANAV      |              |            | 733        |     |  |
| Chicken    | 718 |                           | LLPTAPTAPR | PHSWLPPGAT  | LRLLLROAFG | GAPSGESSPL | LRANAV      |              |            | 763        |     |  |
| Human      | 620 |                           | LMKQDFSVPO | ----LPHSSS  | HWLRLPRIFC | SCPIGENSPL | LSGQQV      |              |            | 661        |     |  |

**Figure S7. Predicted protein domains of quail PMEL.** Amino acid sequences of PMEL in the WE strain of quail, chicken (NP\_990443.2), and human (NP\_001186983.1) are aligned. Protein motifs, except for the polycystic kidney disease (PKD) domain, were predicted based on amino acid sequence homology between quail and chicken PMEL (Kerje et al. 2004). The PKD domain was predicted using Pfam 31.0 (<http://pfam.xfam.org/>) [The Pfam protein families database: towards a more sustainable future (doi: 10.1093/nar/gkv1344)].

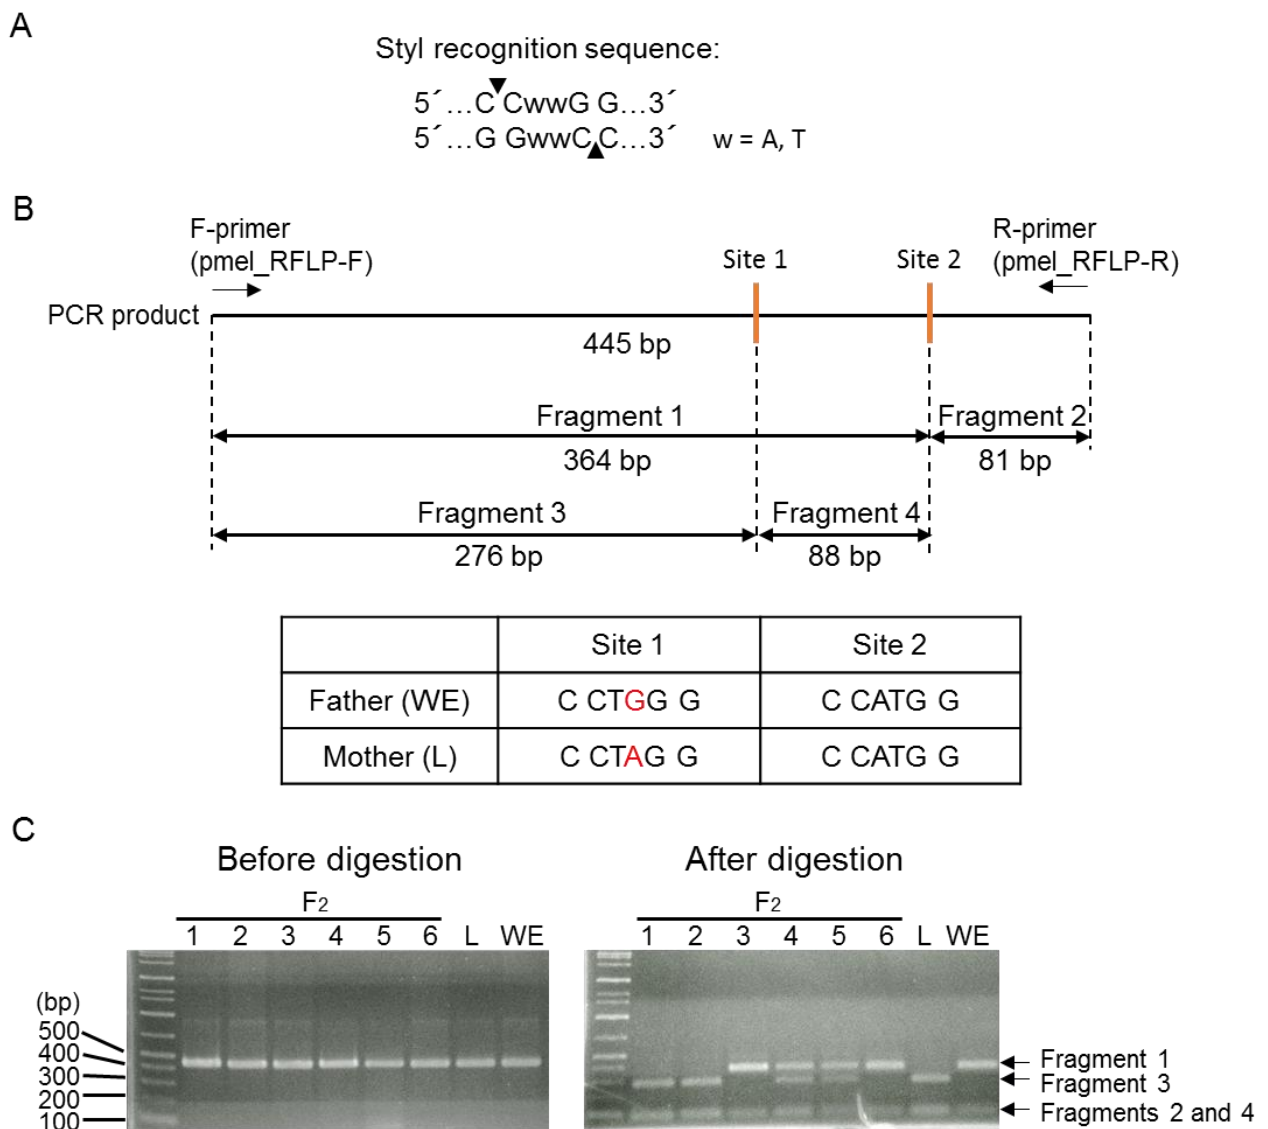

**Figure S8. Schematic representation of PCR-RFLP analysis to determine genotypes at the site of the candidate mutation. (A)** Schematic diagram of Styl recognition sequence. **(B)** Schematic diagram of PCR product and restriction fragments. Site 1 is a 6-bp sequence that contains the site of the candidate mutation for the *yw* phenotype, which is shown by red-colored G and A in the table. Site 1 is recognized by Styl in the maternal genome, but not in the paternal genome. Site 2 is recognized by Styl in both parents. Restriction enzyme digestion of a 445-bp PCR product yields two DNA fragments (fragments 1 and 2) from the paternal DNA, three DNA fragments (fragments 2–4) from the maternal DNA, and four DNA fragments (fragments 1–4) from heterozygotes. **(C)** Representative result of PCR-RFLP analysis, which indicates genotypes of six  $F_2$  individuals ( $F_2$ ) and parents (L and WE) at the site of the candidate mutation. The left image shows banding patterns of PCR products before digestion and the right image shows those after digestion. The original image for these gel images is shown in Fig. S10.

**A**

|   | Strain | Plumage color                            |    | Strain   | Plumage color     |
|---|--------|------------------------------------------|----|----------|-------------------|
| 1 | L      | Yellowish                                | 6  | rb-TKP   | Black (recessive) |
| 2 | WE     | Normal                                   | 7  | French   | Yellow (dominant) |
| 3 | AMRP   | Panda (normal color spotting, recessive) | 8  | W (Wild) | Normal            |
| 4 | Quv    | Normal                                   | 9  | JW       | Normal            |
| 5 | RWN    | Normal                                   | 10 | Estonian | Panda             |

**B**

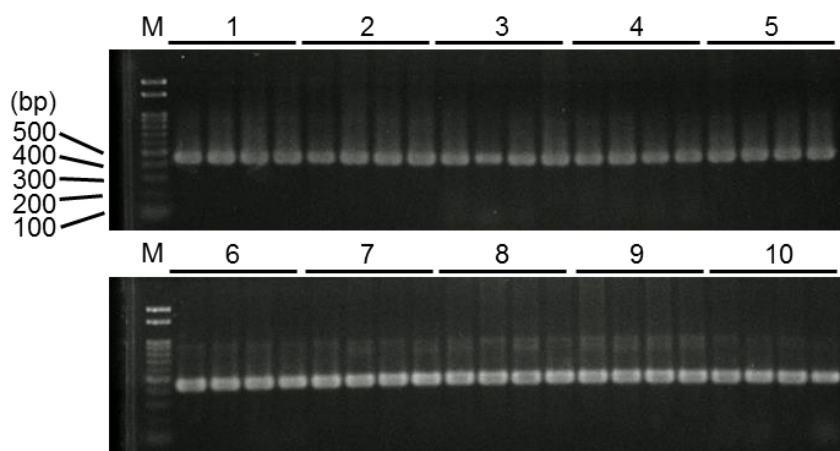

**C**

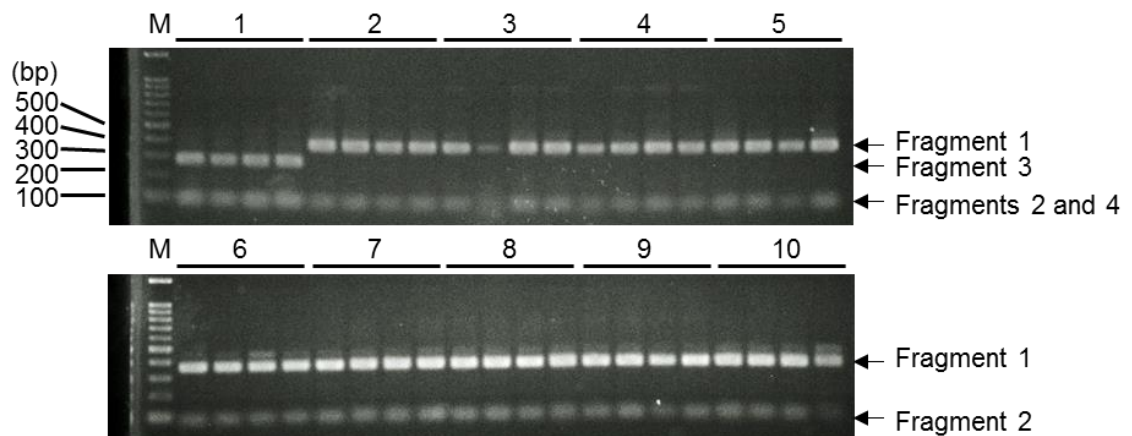

**Figure S9. PCR-RFLP analysis for detection of the candidate mutation in ten quail strains.** (A) Ten quail strains were used for analysis. (B, C) RFLP analysis of PCR products by agarose gel electrophoresis. PCR products before digestion (B) and those after digestion with Styl (C). 'M' indicates the lanes for the DNA ladder marker. Numbers above the images indicate the strains shown in (A). Four individuals were used for each strain. All individuals of the L strain were homozygous for the mutant allele; however, the others do not show that genotype. Original images for these gel images are shown in Fig. S10.

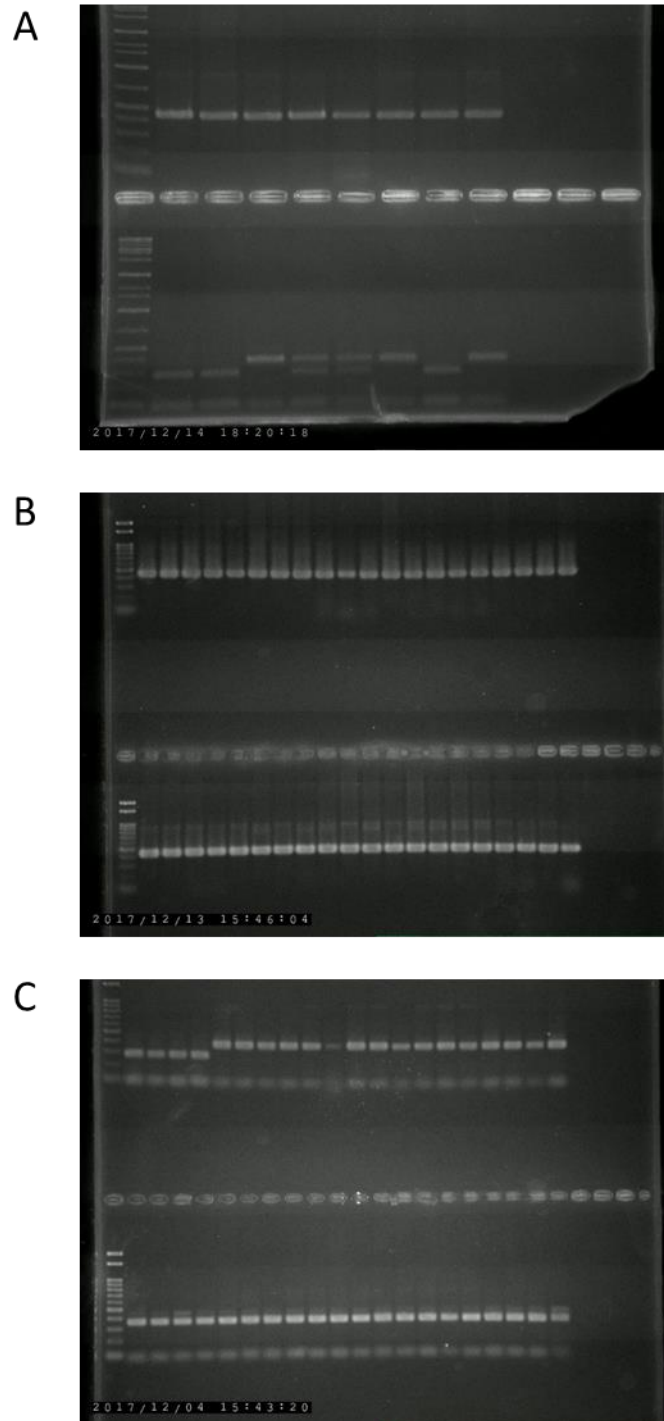

**Figure S10. Images of agarose gels used for Figs. S8 and S9** (A) Image of a gel used for Fig. S8. The upper part shows banding patterns of PCR products before digestion and the lower part shows those after digestion. (B, C) Images of gels used for Figs. S9B and C show banding patterns of PCR products before digestion (B) and those after digestion (C).
